1 **The Contributions from the Progenitor Genomes of the Mesopolyploid Brassiceae are**  
2 **Evolutionarily Distinct but Functionally Compatible**

3 Yue Hao<sup>1</sup>, Makenzie E. Mabry<sup>2</sup>, Patrick P. Edger<sup>3,4</sup>, Michael Freeling<sup>5</sup>, Chunfang Zheng<sup>6</sup>, Lingling Jin<sup>7</sup>,  
4 Robert VanBuren<sup>3,8</sup>, Marivi Colle<sup>3</sup>, Hong An<sup>2</sup>, R. Shawn Abrahams<sup>2</sup>, Jacob D. Washburn<sup>9</sup>, Xinshuai Qi<sup>10</sup>,  
5 Kerrie Barry<sup>11</sup>, Christopher Daum<sup>11</sup>, Shengqiang Shu<sup>11</sup>, Jeremy Schmutz<sup>11,12</sup>, David Sankoff<sup>6</sup>, Michael S.  
6 Barker<sup>10</sup>, Eric Lyons<sup>13</sup>, J. Chris Pires<sup>2,14</sup> and Gavin C. Conant<sup>1,15,16,17</sup>

7 1. Bioinformatics Research Center, North Carolina State University, Raleigh, NC 27695

8 2. Division of Biological Sciences, University of Missouri - Columbia, Columbia, MO 65211

9 3. Department of Horticulture, Michigan State University, East Lansing, MI 48824

10 4. Ecology, Evolutionary Biology and Behavior, Michigan State University, East Lansing, MI 48824

11 5. Department of Plant and Microbial Biology, University of California, Berkeley, CA 94720

12 6. Department of Mathematics and Statistics, University of Ottawa, Ottawa, ON, K1N 6N5, Canada

13 7. Department of Computing Science, Thompson Rivers University, Kamloops, BC, V2C 0C8, Canada

14 8. Plant Resilience Institute, Michigan State University, East Lansing, MI 48824

15 9. Plant Genetics Research Unit, USDA-ARS, Columbia, MO 65211

16 10. Department of Ecology & Evolutionary Biology, University of Arizona, Tucson, AZ 85721

17 11. Department of Energy Joint Genome Institute, Lawrence Berkeley National Lab, Berkeley, CA 94720

18 12. HudsonAlpha Institute for Biotechnology, Huntsville, AL 35806

19 13. School of Plant Sciences, University of Arizona, Tucson, AZ 85721

20 14. Informatics Institute, University of Missouri – Columbia, Columbia, MO 65211

21 15. Program in Genetics, North Carolina State University, Raleigh, NC 27695

22 16. Department of Biological Sciences, North Carolina State University, Raleigh, NC 27695

23 17. Division of Animal Sciences, University of Missouri - Columbia, Columbia, MO 65211

24 Correspondence: [gconant@ncsu.edu](mailto:gconant@ncsu.edu)

25 Running title: Subgenome differentiation after Brassiceae hexaploidy

26 Keywords: *Brassica*, polyploidy, biased fractionation, subgenomes, *Crambe hispanica*

1 **Abstract**

2           The members of the tribe Brassiceae share an ancient whole genome triplication (WGT), and  
3 plants in this tribe display extraordinarily high within-species morphological diversity. One proposed  
4 model for the formation of these mesohexaploid Brassiceae is that they result from a “two-step” pair of  
5 hybridizations. However, evidence supporting this model of formation is still incomplete; meanwhile, the  
6 evolutionary and functional constraints that drove evolution after the hexaploidy are even less understood.  
7 Here we report a new genome sequence of *Crambe hispanica*, a species sister to most sequenced  
8 Brassiceae. After adding this new genome to three others that are also descended from the ancient  
9 hexaploidy, we traced the history of gene loss after the WGT using a phylogenomic pipeline called  
10 POInT (the Polyploidy Orthology Inference Tool). This approach allowed us to confirm the two-step  
11 model of hexaploidy formation. We could also, for the 90,000 individual genes in our study, make  
12 parental “subgenome” assignments, meaning that we can infer, with measured uncertainty, which of the  
13 progenitor genomes of the allohexaploidy each gene derives from. We show that each subgenome has a  
14 statistically distinguishable rate of homoeolog losses. Moreover, our modeling allowed us to infer that  
15 there was a significant temporal gap between the two allopolyploidizations, with about a third of the total  
16 shared gene losses from the first two subgenomes occurring prior to the arrival of the third subgenome.  
17 There is little indication of functional distinction between the three subgenomes: the individual  
18 subgenomes show no patterns of functional enrichment, no excess of shared protein-protein or metabolic  
19 interactions between their members, and no biases in their likelihood of having experienced a recent  
20 selective sweep. We propose a “mix and match” model of allopolyploidy, where subgenome origin drives  
21 homoeolog loss propensities but where genes from different subgenomes function together without  
22 difficulty.

23

## 1 **Introduction**

2 Fifty years ago, Ohno (Ohno 1970) published his famous, and forceful, opus on the role of gene  
3 duplication, and in particular of *genome* duplication (aka polyploidy), in evolutionary innovation. Since  
4 then, evidence both of polyploidy's ubiquity (Wolfe and Shields 1997; Soltis and Soltis 2012; Van de  
5 Peer et al. 2009, 2017) and of its role in evolutionary innovations such as yeast aerobic glucose  
6 fermentation, the organization of the retinae of teleost fishes and in plant defensive compounds has  
7 continued to accumulate (Conant and Wolfe 2007; Merico et al. 2007; van Hoek and Hogeweg 2009;  
8 Edger et al. 2015; Sukeena et al. 2016). Preeminent among the polyploid lineages are the flowering  
9 plants, where over 180 ancient polyploidies are known (One Thousand Plant Transcriptomes Initiative  
10 2019).

11 When a new polyploid genome is created by merging of similar but not identical progenitor  
12 species, the event is referred to as an allopolyploidy. Among allopolyploidies, the preferential retention of  
13 gene copies (homoeologs) from one of the included parental subgenomes over the others has been  
14 observed in yeast, maize, cotton, monkeyflower, *Arabidopsis*, *Brassica*, and nematodes (Thomas et al.  
15 2006; Conant and Wolfe 2008a; Cheng et al. 2012; Parkin et al. 2014; Renny-Byfield et al. 2015; Edger et  
16 al. 2017; Emery et al. 2018; Schoonmaker et al. 2020). Allopolyploids also show a tendency for genes  
17 from one of the subgenomes to be more highly expressed: genes from the remaining subgenomes have a  
18 correspondingly greater chance of being silenced or even lost completely, suggesting one mechanism that  
19 might drive preferential retention. This phenomenon has been called “subgenome dominance,” and the  
20 resulting pattern of gene retention is known as “biased fractionation” (Thomas et al. 2006; Schnable et al.  
21 2011; Yoo et al. 2014). A number of hypotheses have been proposed to explain why homoeologs from  
22 different subgenomes display these expression differences, including variations in transposon silencing  
23 across subgenomes (Freeling et al. 2012; Woodhouse et al. 2014; Zhao et al. 2017; Alger and Edger  
24 2020), disruption of the organelle-nucleus communication in the more fractionated subgenomes  
25 (Sharbrough et al. 2017; Costello et al. 2019), and epigenetic changes induced by the genomic shock of  
26 merging genetically distinct subgenomes (McClintock 1984; Wendel et al. 2018; Bird et al. 2018). In

1 addition, we and others have proposed that allopolyploids might bring together coevolved and conflicting  
2 copies of multi-protein complexes (Codoñer and Fares 2008; Gong et al. 2012; Scienski et al. 2015;  
3 Emery et al. 2018): early random gene losses from one subgenome that partly resolved these conflicts  
4 might then set the polyploidy down a path favoring losses from that subgenome. A related proposal was  
5 made by Makino and McLysaght (2012), namely that selection to maintain dosage balance among  
6 interacting gene neighbors could produce local, and eventually global, biases in fractionation.

7         It is also important to recall that not all homoeologs are equally likely to revert to single-copy  
8 after a polyploidy, regardless of the level of biased fractionation. Duplicated genes coding for  
9 transcription factors, ribosomal proteins and kinases are over-retained after independent polyploidies in  
10 flowering plants, yeasts, ciliates and vertebrates (Seoighe and Wolfe 1998; Blanc and Wolfe 2004; Maere  
11 et al. 2005; Aury et al. 2006; Makino and McLysaght 2010). These patterns are best explained by a need  
12 to maintain dosage balance among highly interacting genes (Birchler et al. 2005; Hakes et al. 2007;  
13 Birchler and Veitia 2012, 2014; Conant et al. 2014). Curiously, there are also genes that prefer *not* to be  
14 duplicated: genes for DNA repair and those targeted to organelles have returned to single-copy rapidly  
15 after genome duplication (De Smet et al. 2013; Conant 2014).

16         The tribe Brassiceae experienced a hexaploidy (aka whole genome triplication; WGT) between 5  
17 and 9 MYA and after its divergence from *Arabidopsis thaliana* (Wang et al. 2011). The *Brassica* WGT is  
18 a valuable system for studying all of the phenomena mentioned above because the nature of the  
19 triplication allows us to explore each in unusual detail. This polyploidy was originally inferred by  
20 comparative linkage mapping studies between *Brassica* species and *A. thaliana* (Lagercrantz 1998;  
21 Lukens et al. 2004; Parkin et al. 2005; Schranz et al. 2006) and confirmed by chromosome painting  
22 (Lysak et al. 2005; Lysak 2009). The patterns of biased fractionation observed in the genome of *Brassica*  
23 *rapa* suggested that the triplication “event” was actually two separate allopolyploid hybridizations  
24 involving three distinct diploid progenitor species, with the merger of the two currently highly  
25 fractionated ancestral subgenomes occurring first, followed by the subsequent addition of a third  
26 subgenome, which currently possesses the most retained genes (Tang et al. 2012; Cheng et al. 2012). The

1 Brassiceae are the most morphologically diverse tribe in the family *Brassicaceae*, a condition that is  
2 believed to be partly due to this hexaploidy (Cheng et al. 2014), and contain important vegetable and  
3 oilseed crops, such as broccoli, cabbage, kale, mustard and canola. However, to fully understand this  
4 polyploidy, a phylogenetically broader analysis of the genomes that descend from it would be very  
5 helpful. For instance, a genome from the genus *Crambe*, a member of the Core Brassiceae that is sister to  
6 the genus *Brassica* (Arias and Pires 2012), would allow for better resolution of the timing of post-  
7 hexaploidy gene losses. Biologically, species in the genus *Crambe* are not only an important industrial  
8 oilseed source because of their high erucic acid content (Lazzeri et al. 1997; Warwick and Gugel 2003;  
9 Carlsson et al. 2007) but also could serve as resources for *Brassica* crop breeding and development  
10 (Rudloff and Wang 2011).

11         Using a new genome sequence from *Crambe hispanica*, we analyzed the *Brassica* WGT with our  
12 tool for modeling post-polyploidy genome evolution: POInT (the Polyploidy Orthology Inference Tool)  
13 (Conant and Wolfe 2008a). We sought to first confirm the two-step hexaploidy model and its relationship  
14 to the observed three subgenomes in the extant genomes. POInT, which we recently extended to allow the  
15 analysis of WGTs (Schoonmaker et al. 2020), is ideally suited to this task, because it can model  
16 homoeolog losses phylogenetically and test for biases in fractionation without *ad hoc* assumptions.

17         We find strong support for the two-step WGT formation model and for the first time give  
18 evidence for a significant gap in time between the two events. Our novel methods for linking subgenome  
19 assignments to biological network structure gives new insights on if and how gene function shaped the  
20 resolution of the hexaploidy. In fact, we find no evidence that co-evolved functional modules have driven  
21 gene losses: while the three subgenomes are clearly distinguishable in their loss patterns, there are no  
22 indications that members of the same subgenome share more functional associations than do genes from  
23 differing subgenomes.

24

## 1 **Results**

### 2 *A well-assembled and annotated genome of *Crambe hispanica**

3           The genome of *Crambe hispanica* was assembled using PacBio reads. This assembly had a contig  
4 N50 of 4.4 Mb across 1,019 contigs with a total assembly length of 480 Mb. Eleven terminal telomeres  
5 were resolved by the Canu assembler (Koren et al. 2017). The assembly graph showed low heterozygosity  
6 and few assembly artifacts, with the exception of one mega-cluster consisting of a high copy number LTR  
7 across 500 contigs and spanning ~30 Mb. The draft assembly was then polished using Illumina paired-end  
8 data. We also used Hi-C proximity ligation sequencing data to scaffold the genome, which resulted in 18  
9 scaffolds that include 99.5% of the original assembly with a scaffold N50 of 32.6 Mbp and scaffold N90  
10 of 30.1 Mbp. The annotated genome is of high quality: we compared its gene set against the  
11 Benchmarking Universal Single-Copy Orthologs (BUSCO v.2; Simão et al. 2015) plant dataset  
12 (embryophyta\_odb9), finding that 95.8% of these expected genes were present in our annotation.

13

### 14 *Inferring blocks of triple-conserved synteny in four triplicated Brassiceae genomes and estimating an* 15 *ancestral gene order*

16           Based on their phylogenetic placement and assembly quality, we selected and retrieved from  
17 CoGe (Lyons and Freeling 2008; Lyons et al. 2008a) three additional mesohexaploid genomes for our  
18 analyses: those of *Brassica rapa* (version 1.5, CoGe id 24668; Wang et al. 2011), *Brassica oleracea*  
19 (TO1000 version 2.1, CoGe id 26018; Liu et al. 2014; Parkin et al. 2014) and *Sinapis alba* (version 1.1,  
20 CoGe id 33284). For each of these four genomes, we inferred blocks of triple conserved synteny (TCS),  
21 with the genome of *Arabidopsis thaliana* used as an unduplicated reference. We then merged these blocks  
22 across all of the four genomes: we refer to each such locus as a “pillar.” Each pillar consists of between 1  
23 and 3 surviving genes in each of the four genomes. As described in the *Methods*, we used both a set of  
24 TCS blocks inferred with POInT containing 14,050 pillars ( $P_{pillars}$ ) and a separate ancestral genome  
25 reconstruction that estimates the gene order that existed just prior to the WGT. The latter contains five

1 reconstructed ancestral chromosomes involving 89 scaffolds with a total of 10,868 ancestral genes. When  
2 we match these genes to the TCS blocks computed with POInT, the result is 7,993 ancestrally-ordered  
3 pillars ( $A_{pillars}$ ).

4

#### 5 *Inferring the evolutionary relationships of the four Brassiceae genomes from gene loss patterns*

6 We fit models of WGT evolution (see below) to several different orderings of the 14,050 pillars  
7 in the  $P_{pillars}$  set and to the  $A_{pillars}$  (Supplemental Table S1). These orderings of the  $P_{pillars}$  differed in their  
8 number of synteny breaks: we used the ordering with the highest likelihood under the WGT 3rate G1Dom  
9 model for our remaining analyses (see below). Similarly, we compared the fit of three possible  
10 phylogenetic topologies to the pillars under this model: the remainder of our analyses use the topology  
11 shown in Figure 1, which has the highest likelihood. Curiously, one of the other two topologies, while  
12 having a lower likelihood under POInT's models (Supplemental Fig S1), is the phylogeny estimated using  
13 the plastid genome (Arias and Pires 2012). Because the  $A_{pillars}$  give similar parameter estimates but  
14 comprise a smaller dataset, we will discuss our results in terms of the  $P_{pillars}$ .

15

#### 16 *The three subgenomes differ in their propensity for homoeolog copy loss*

17 POInT employs user-defined phylogenetic Markov models of gene loss after WGT. These models  
18 have seven states (Figure 2): the triplicated state **T** in which all three copies after WGT are still present;  
19 the “duplicated” states **D<sub>1,2</sub>**, **D<sub>1,3</sub>**, **D<sub>2,3</sub>** where one out of the three gene copies has been lost, and three  
20 single-copy state **S<sub>1</sub>**, **S<sub>2</sub>**, and **S<sub>3</sub>**. Previous work suggested that the three subgenomes that formed these  
21 hexaploids are distinct in their patterns of gene preservation (Tang et al. 2012; Cheng et al. 2012),  
22 consisting of a “less fractionated” genome (LF), a subgenome with intermediate levels of gene loss (more  
23 fractionated 1 or MF1) and an even more fractionated subgenome (MF2). We hence defined state **S<sub>1</sub>** to  
24 correspond to LF and **S<sub>2</sub>** and **S<sub>3</sub>** to MF1 and MF2, respectively.

25 POInT statistically assigned genes from each of the four mesopolyploid genomes to the LF, MF1  
26 and MF2 subgenomes with high confidence: 75% of the pillars have subgenome assignments with

1 posterior probabilities  $> 0.84$  (Supplemental Fig S3). We observe clear signals of biased fractionation:  
2 while we estimate that 2,864 genes were lost from the LF subgenome along the shared root branch (e.g.,  
3 prior to the split of *S. alba* from the other three species), the corresponding figures for MF1 and MF2 are  
4 5,373 and 6,347 respectively (Figure 1). These values are in qualitative agreement with previous findings  
5 (Xie et al. 2019; Liu et al. 2014; Cheng et al. 2014, 2012).

6 We assessed the statistical support for these estimated differences in the subgenomes' rates of  
7 homoeolog loss using a set of nested models of post-WGT gene loss. We started with a model (WGT  
8 Null) that did not differentiate between the subgenomes, meaning that the shared base transition rate from  
9 **T** to **D<sub>1,2</sub>**, **D<sub>1,3</sub>** or **D<sub>2,3</sub>** is defined to be  $\alpha$  ( $0 \leq \alpha < \infty$ , Figure 2). The transition rate from **D<sub>1,2</sub>**, **D<sub>1,3</sub>** or **D<sub>2,3</sub>** to  
10 **S<sub>1</sub>**, **S<sub>2</sub>** or **S<sub>3</sub>** is scaled by  $\sigma$ : e.g., occurs at rate  $\alpha \bullet \sigma$ . We compared this model to a more complex one that  
11 allowed losses of both triplicated and duplicated genes to be less frequent from a posited less-fractionated  
12 subgenome LF (WGT 1Dom, Figure 2). This model introduces a fractionation parameter  $f_l$  ( $0 \leq f_l \leq 1$ ),  
13 which potentially makes the transitions between **T** and **D<sub>2,3</sub>** rarer than the other T-to-D rates ( $\alpha \bullet f_l$ ; see  
14 Figure 2). The WGT 1Dom model fits the pillar data significantly better than does WGT Null (Figure 2;  
15  $P < 10^{-10}$ , likelihood ratio test with two degrees of freedom). We next compared the WGT 1Dom model to  
16 a WGT 1Dom<sub>G3</sub> model that gives MF1 and MF2 separate loss rates. Again, this model gives a better fit to  
17 the pillar data than did WGT 1Dom ( $P < 10^{-10}$ , likelihood ratio test with two degrees of freedom, Figure 2).  
18 We hence confirm the presence of three subgenomes, distinguishable by their patterns of homoeolog loss.  
19 It is important to recall here that our approach does not require the identification of these three  
20 subgenomes *a priori*: the probabilistic assignment of genes to subgenomes is an integral part of the  
21 POInT orthology computation: as a result, the inherent uncertainty in these assignments is accounted for  
22 in estimating the various biased fractionation parameters.

23



1 *Patterns of post-WGT gene loss support the “two-step” model of hexaploidy*

2 To test the hypothesis that the WGT proceeded in two steps (Cheng et al. 2012; Tang et al. 2012),  
3 we used two approaches. First, we applied an extended version of the WGT 1Dom<sub>G3</sub> model where each  
4 model parameter was allowed to take on distinct values on the root branch and on the remaining branches  
5 (Root-spec. WGT 1Dom<sub>G3</sub> in Figure 2). This extended model fits the pillar data significantly better than  
6 does the original WGT 1Dom<sub>G3</sub> model ( $P < 10^{-10}$ , likelihood ratio test with five degrees of freedom, Figure  
7 2). The biased fractionation parameters for the root branch differ from those of the remaining branches:  
8 the value of  $f_{1,3}$  on the root is smaller than on later branches (0.6445 versus 0.7368) while  $f_{2,3}$  is larger  
9 (0.6766 versus 0.4078). These values are consistent with a two-step hypothesis: prior to the arrival of LF,  
10 there would have been a number of losses from MF1 and MF2, meaning that the relative preference for  
11 LF would be higher (smaller  $f_{1,3}$ ).

12 In our second approach, we developed a specific model of the two-step hexaploidy (WGT  
13 1Dom<sub>G3</sub>+Root<sub>LF</sub> in Figure 2). This model describes the transition from a genome *duplication* to a  
14 triplication: all pillars start in state **D**<sub>2,3</sub>: e.g., the first allopolyploidy has just occurred and the MF1 and  
15 MF2 genes are present but not the LF ones. We then model the addition of LF as transitions to either the  
16 **T**, **D**<sub>1,2</sub> or the **D**<sub>1,3</sub> states (with rates  $\tau$ ,  $\beta_{1,2}$  or  $\beta_{1,3}$ , respectively). State **T** is seen when no losses occurred  
17 prior to the arrival of LF, the other states occur when either MF1 or MF2 experienced a loss prior to the  
18 arrival of LF. Any pillars that remain in **D**<sub>2,3</sub> had no corresponding gene arrive from LF. Of course, at the  
19 level of the individual pillar, we have insufficient data to make such inferences: the utility of this model is  
20 to give global estimates of the degree of fractionation seen in MF1 and MF2 prior to the arrival of LF.  
21 This model offers a significantly improved fit over WGT 1Dom<sub>G3</sub> ( $P < 10^{-10}$ , likelihood ratio test with  
22 three degrees of freedom, Figure 2). More importantly, we can propose other versions of this model  
23 where either MF1 or MF2 is the last arriving subgenome: when we do so, the model fit is much worse  
24 than seen with WGT 1Dom<sub>G3</sub>+Root<sub>LF</sub> model (Supplemental Table S1). Hence, we can conclude that  
25 subgenomes MF1 and MF2 had already begun a process of (biased) fractionation prior to the addition of

1 the LF subgenome. Note that these conclusions derive only from genes that were inferred to be present in  
2 all three parental subgenomes, a requirement of the POInT models.

3

#### 4 *A gap between the two allopolyploidies*

5 This root-specific model also allows us to estimate the state of MF1 and MF2 immediately before  
6 the arrival of LF. In particular, we can estimate the percentage of pillars that had already experienced  
7 losses prior to LF's arrival. About 28% of all of the MF1 homoeologs inferred to have been lost on the  
8 root branch were lost prior to the arrival of LF, with the equivalent number of MF2 losses being 38%. A  
9 negligible 0.3% of pillars do not appear to have received a copy of the LF homoeolog.

10

#### 11 *Mixed evidence for differences in selective constraint between subgenomes*

12 In our dataset there 218 loci that have retained triplicates in all four genomes and have  
13 subgenome assignment confidence  $\geq 95\%$ . For each loci, we calculated the selective constraints the group  
14 of 12 genes using codeml (Yang 2007), allowing the genes from each subgenome to have a different  
15 dN/dS value. On average, among these retained triplets, genes from the LF subgenome show slightly  
16 smaller dN/dS values than do those from MF1 and MF2, but these differences are not statistically  
17 significant (Wilcoxon rank sum tests LF - MF1:  $P = 0.300$ , LF - MF2:  $P = 0.079$ ; Supplemental Fig S4).

18

#### 19 *Single copy genes from multiple subgenomes are enriched in genes functioning in DNA repair*

20 GO overrepresentation tests were performed with the *Arabidopsis* orthologs of genes returned to  
21 single copy by the end of the root branch from each subgenome. Similar to previous findings (De Smet et  
22 al. 2013), we found that single copy genes are enriched in biological processes such as DNA repair and  
23 DNA metabolism (Supplemental Fig S5). More specifically, single copy genes from the LF subgenome  
24 are enriched in base-excision repair, while MF1 single copy genes are enriched in nucleotide-excision  
25 repair, non-recombinational repair and double-strand break repair (Supplemental Fig S5a). Intriguingly,  
26 single copy genes from both LF and MF1 show overrepresented molecular functions in endo- and

1 exodeoxyribonuclease activities (Supplemental Fig S5b). LF single copy genes are also enriched in RNA  
2 interference processes, suggesting that such interference, targeted to the MF1 and MF2 subgenomes,  
3 could be one mechanism by which biased fractionation was driven.

4

5 *Genes from the same subgenome are not overly likely to physically or metabolically interact*

6 For genes with high subgenome assignment confidence ( $\geq 95\%$ ), we mapped those assignments  
7 (LF, MF1 or MF2) and the duplication status at the end of the root branch onto the nodes (gene products)  
8 of the *A. thaliana* protein-protein interaction (PPI) network (*Methods*). For comparative purposes, we also  
9 produced a mapping of an extant network, based on the gene presence/absence data and subgenome  
10 assignments in *B. rapa*. Not surprisingly, in the “ancient” network inferred at the end of the common root  
11 branch, there are a relatively large number of nodes (1,952) associated with surviving triplicated loci:  
12 these nodes were connected by a total of 2,384 triplet-to-triplet edges. The *B. rapa*-specific network  
13 contains fewer nodes with retained triplets (662): there were 263 edges connecting these nodes (Figure  
14 3a).

15 The dosage constraints that affect surviving gene copies post-polyploidy will tend to result in the  
16 retention of genes involved in multiunit complexes or in the same signaling pathways (Birchler and Veitia  
17 2007, 2012; Conant et al. 2014). Thus, we expected to see that the retained triplets showed higher  
18 network connectivity. And indeed, our permutation tests reveal that the retained triplets on the root branch  
19 are significantly over-connected to each other in the PPI network ( $P = 0.018$ , Supplemental Fig S6). We  
20 also hypothesized that proteins coded for from the same subgenome would be more likely to be connected  
21 due to preferential retention of genes from a single complex from the same subgenome. To test this idea,  
22 we partitioned the gene products based on their subgenome of origin. The LF subgenome contains more  
23 genes and thus more exclusive connections (Figure 3b). When considering only genes that had returned to  
24 single-copy by the end of the root, we identified 188 LF-LF edges among 886 single copy LF genes, with  
25 fewer edges exclusive to MF1 and MF2 genes (30 and 3, respectively). We used randomization (see  
26 *Methods*) to test whether the numbers of such subgenome-specific edges differed from what would be

1 expected by chance. When considering the network as a whole, we found that there were significantly  
2 fewer LF-LF edges than expected ( $P = 0.022$ ; Supplemental Fig S6). However, when we considered only  
3 the single-copy genes in the network, the number of subgenome-specific edges did not differ from that  
4 seen in random networks for any of the three subgenomes ( $P = 0.286$  for LF-LF edges, see Supplemental  
5 Fig S6), suggesting that the original dearth of such edges was a statistical artifact resulting from the  
6 excess of triplet-to-triplet edges.

7 We also explored the association of between genes' role in metabolism and their pattern of post-  
8 hexaploidy evolution using the *A. thaliana* metabolic network (*Methods*). However, again considering the  
9 state of each pillar at the end of the root branch, we did not find an excess of shared metabolic  
10 interactions between triplicated or single-copy genes in this network (Supplemental Fig S6).

11 Finally, we asked whether genes from the same subgenome are more likely to be co-expressed.  
12 We constructed a *B. rapa* co-expression network from the RNASeq data described in the *Methods*  
13 section. In this network edges connect pairs of genes that are highly correlated in their expression  
14 (*Methods*). The inferred co-expression network contains 3,933 nodes (e.g., genes) from the LF  
15 subgenome, 2,310 nodes from MF1 and 1,982 from MF2. We then counted the number of edges  
16 connecting pairs of nodes from the same subgenome. To assess whether there was an excess of such  
17 shared subgenome co-expression relationships, we randomly rewired the network 100 times and  
18 compared the edge count distributions from these randomized networks to those of the real network  
19 (Pérez-Bercoff et al. 2011). We found that the real network did not show a significant excess of shared  
20 edges between genes from the same subgenome when compared to the randomized networks (LF-LF  
21  $P=0.36$ , MF1-MF1  $P=0.82$ , MF2-MF2  $P=0.08$ , Figure 4).

22

### 23 *Subgenome of origin does not affect the propensity to have experienced a selective sweep*

24 We tested for associations between genes' subgenome of origin and their propensity to  
25 experience recent selective sweeps. Data on these sweeps was taken from a recent scan in *B. rapa* by Qi  
26 et al. (Qi et al. 2020). No subgenome had either an excess or a deficit of observed sweeps relative to the

1 other two (Supplemental Fig S7). Genes from the MF1 subgenome showed slightly negative association  
2 with selective sweeps ( $P = 0.0089$ , chi-square test).

3

#### 4 **Discussion**

5         The combination of the new genome sequence of *Crambe hispanica* and our modeling of the  
6 post-WGT evolution of the four Brassiceae genomes using POInT allowed us to draw a number of  
7 conclusions regarding the *Brassica* WGT. We confirmed previous work (Tang et al. 2012; Cheng et al.  
8 2012) arguing that these genomes derive from a pair of ancient allopolyploidies: more subtly, we also  
9 show that, as had also been proposed, the least fractionated subgenome (e.g., the one with the most  
10 retained genes) is very likely the genome that was added last. To these proposals, we add the new  
11 observation that these hybridization events were likely not particularly closely spaced in time: our model  
12 predicts that on the order of 1/3 of the gene losses from subgenomes MF1 and MF2 that occurred on the  
13 root branch occurred *before* the arrival of the LF subgenome. Of course, one should not take this result to  
14 necessarily imply a very large number of calendar years between the events: gene loss immediately after  
15 polyploidy can be quite rapid (Scannell et al. 2007; De Smet et al. 2013). In the future, it will be  
16 interesting to further refine the timing of these events: the problem, however, is a challenging one because  
17 the allopolyploid nature of the events means that molecular clock approaches will tend to estimate  
18 speciation times for the allopolyploid ancestors rather than hybridization times.

19         Many forces shape genome evolution after polyploidy. A tendency for genes that operate in  
20 multiunit complexes or involved in signaling cascades to remain duplicated post-polyploidy is best  
21 explained by the presence of dosage constraints driven by a need to maintain the stoichiometry and  
22 kinetics of assembly for such functional units (Birchler et al. 2005; Birchler and Veitia 2007, 2012;  
23 Conant et al. 2014; Birchler et al. 2016). On the other hand, genes involved in functions such as DNA  
24 repair very often return rapidly to singleton status after duplication (Freeling 2009; De Smet et al. 2013).  
25 Our results illustrate the importance of these dosage effects, with genes whose products interact with  
26 many other gene products in *A. thaliana* being overly likely to be retained in triplicate in these *Brassicaceae*

1 genomes. Notably, this pattern is not observed for metabolic genes, a result we interpret as illustrating  
2 metabolism's dynamic robustness to gene dosage changes (Kacser and Burns 1981).

3 We had previously argued that one force driving the biased fractionation that distinguishes the  
4 LF, MF1 and MF2 subgenomes might be selection to maintain coadapted complexes from a single  
5 parental subgenome (Emery et al. 2018). That such coadapted complexes exist and respond to polyploidy  
6 is suggested by the gene conversions seen after the yeast polyploidy among the duplicated ribosomal and  
7 histone proteins (Evangelisti and Conant 2010; Scienski et al. 2015). However, these examples may be  
8 exceptions rather than the rule, meaning that pressure to maintain coadapted complexes is not a  
9 significant driver of biases in fractionation. We found that although there was some degree of functional  
10 distinction for single copy genes from the LF subgenome (e.g., enrichment in biological processes such as  
11 DNA repair and RNA interference), more generally speaking, there was no significant evidence of  
12 functionally incompatibility of single-copy genes from different subgenomes. Thus, genes from the same  
13 subgenome were not more likely to interact with each other physically, nor were the genes returned to  
14 single copy on the common root branch functionally subdivided among the subgenomes. And even the  
15 DNA repair enzyme genes that rapidly returned to single-copy appear to derive from at least two of the  
16 three subgenomes. It hence appears that De Smet et al.'s (2013) original hypothesis that these genes may  
17 be prone to dominant negative interactions may best explain their preference for a single-copy state.

18 It remains to be seen if the “mix and match” pattern of subgenome retention observed here  
19 represents the dominant mode of evolution for allopolyploidies. Of course, whether or not subgenome  
20 conflicts exist may be partly a question of the preexisting differences between the progenitor species, and  
21 a more general survey of allopolyploidies that includes estimates of the progenitor genomes' divergence  
22 prior to the polyploidy events would be most enlightening. If the pattern holds, however, the implications  
23 could be significant: hybridization represents a potentially important means of adaption (Paterson 2005;  
24 Hollister 2015; Alix et al. 2017; Blanc-Mathieu et al. 2017; Smukowski Heil et al. 2017), and if we  
25 combine this factor with the propensity for polyploidies to generate evolutionary innovations (Edger et al.  
26 2015) and the value of holding dosage sensitive genes in duplicate long enough to allow such innovations

1 (Blanc and Wolfe 2004; Conant and Wolfe 2008b; Conant et al. 2014; Zhao et al. 2017; Liang and  
2 Schnable 2018; Qiu et al. 2020), we can find ourselves in a position to strongly support Ohno’s arguments  
3 on the power of polyploidy.

4

## 5 **Methods**

6

### 7 *Crambe hispanica* (PI 388853) sample preparation, genome sequencing

8 Leaf tissue was harvested from 36 dark treated inbred plants (selfed for nine generations; PI  
9 388853). Dark treatment was performed to reduce chloroplast abundance and involved leaving the plants  
10 in a dark room for 3-4 days. After treatment, 5g of tissue was collected across 36 plants. This process was  
11 repeated three times, allowing us to obtain a total of 15g of tissue. This tissue was then sent to the  
12 University of Delaware Sequencing and Genotyping Center at the Delaware Biotechnology Institute  
13 (Newark, DE, USA) for high molecular weight DNA isolation and library preparation prior to PacBio  
14 (Pacific Biosciences, Menlo Park, CA, USA) and Illumina (San Diego, CA) sequencing. Libraries were  
15 prepared using standard SMRTbell procedures, followed by sequencing of 11 PacBio SMRT cells on a  
16 PacBio sequel and one PacBio SMRT cell of RSII sequencing. Paired-end 150 bp reads were generated  
17 on an Illumina HiSeq 2500 system. For Hi-C scaffolding, 0.5g tissue sample was sent to Phase Genomics  
18 (Phase Genomics Inc. Seattle, WA, USA).

19

### 20 *Crambe hispanica* v1.1 genome assembly and annotation

21 The assembly of the *Crambe hispanica* v1.1 genome was performed using Canu v1.6 (Koren et  
22 al. 2017). In total, 3.9 million raw PacBio reads spanning 48 Gb were used as input for Canu. The  
23 following parameters were modified for assembly: minReadLength=1000, GenomeSize=500Mb,  
24 corOutCoverage=200 “batOptions=-dg 3 -db 3 – dr 1 -ca 500 -cp 50”. All other parameters were left as  
25 default. The assembly graph was visualized using Bandage (Wick et al. 2015) to assess ambiguities in the  
26 graph related to repetitive elements and heterozygosity. The draft Canu assembly was polished

1 reiteratively using high-coverage Illumina paired-end data (82 million reads) with Pilon v1.22 (Walker et  
2 al. 2014). Quality filtered Illumina reads were aligned to the genome using bowtie2 v2.3.0 (Langmead  
3 and Salzberg 2012) under default parameters and the resulting bam file was used as input for Pilon with  
4 the following parameters: --flank 7, --K 49, and --mindepth 8. Pilon was run recursively three times using  
5 the updated reference each time to correct the maximum number of residual errors.

6 A Proximo Hi-C library was prepared as described (Phase Genomics Inc. Seattle, WA, USA) and  
7 sequenced on an Illumina HiSeq 2500 system with paired-end 150 bp reads. The *de novo* genome  
8 assembly of Hi-C library reads were used as input data for the Phase Genomics Proximo Hi-C genome  
9 scaffolding platform.

10 The genome was annotated using MAKER (Campbell et al. 2014), using evidence of protein  
11 sequences downloaded from the Araport 11 and Phytozome 12 plant databases (Cheng et al. 2017;  
12 Goodstein et al. 2012) and *C. hispanica* transcriptome data. The transcriptome data for genome  
13 annotation was extracted from bud, root, and leaf tissues under standard daylight conditions using the  
14 ThermoFisher PureLink RNA Mini Kit. Library prep was done using Illumina TruSeq DNA PCR-free  
15 and sequenced for non-stranded mRNA-Seq 2x250 on Illumina HiSeq. *C. hispanica* transcriptomic data  
16 were assembled with StringTie (Pertea et al. 2015). Repetitive regions in the genome were masked using  
17 a custom repeat library and Repbase Update (Bao et al. 2015) through Repeatmasker Open-4.0 (Smit et  
18 al. 2015). *Ab initio* gene prediction was performed using SNAP (Korf 2004) and Augustus (Stanke and  
19 Waack 2003). The resulting MAKER gene set was filtered to select gene models with Pfam domain and  
20 annotation edit distance (AED) < 1.0. Then, the amino acid sequences of predicted genes were searched  
21 against a transposase database using BLASTP and an E-value cutoff of  $10^{-10}$  (Campbell et al. 2014). If  
22 more than 30% of a given gene aligned to transposases after the removal of low complexity regions, that  
23 gene was removed from the gene set.

24



### 1 Triple-conserved Synteny reconstruction

2           We have developed a three-step pipeline for inferring the conserved synteny blocks created by  
3 polyploidy (Emery et al. 2018). For the first step of this pipeline, we used *Arabidopsis thaliana* Col-0  
4 version 10.29 (CoGe genome id 20342) as a nonhexaploid outgroup and identified homologous genes  
5 between it and each of the four hexaploid genomes using GenomeHistory (Conant and Wagner 2002).  
6 Genes were defined as homologous if their translated products shared 70% percent amino acid sequence  
7 identity and the shorter sequence was at least 80% percent of the length of the longer. In the second step,  
8 we sought to place genes from each of the hexaploid genomes into blocks of triple-conserved synteny  
9 (TCS) relative to their *A. thaliana* homologs. To do so, we inferred a set of “pillars,” each of which  
10 contains a single gene (or group of tandem duplicates) from *A. thaliana* and between 1 and 3 genes from  
11 the hexaploidy genome. Using simulated annealing (Kirkpatrick et al. 1983; Conant and Wolfe 2006), we  
12 sought a combination of pillar gene assignments and relative pillar order that maximized the TCS. In the  
13 third and final step, we merged the pillars across the four hexaploid genomes, using their *A. thaliana*  
14 homologs as indices. We then sought a global pillar order that minimized the number of synteny breaks  
15 across all of the hexaploid genomes. These three steps resulted in a set of 14,050 ordered pillars, each  
16 with at least one surviving gene from each of the four genomes (Figure 1) and a corresponding  
17 “ancestral” gene from *A. thaliana*. Supplemental Table S1 shows that POInT’s model inferences are  
18 consistent across a number of such estimated ancestral orders.

19

### 20 An ancestral genome order reconstruction

21           As a verification of our POInT pipeline, we also sought an independent inference of the order of  
22 the genes in the parental subgenomes just prior to the first step of the *Brassica* triplication. First, we used  
23 CoGe’s SynMap (Lyons et al. 2008b) to identify homologs between the *A. thaliana* and *Arabidopsis*  
24 *lyrata* genomes and those between *B. rapa* and *B. oleracea*. The SynMap algorithm was applied with a  
25 chaining distance of 50 genes and a minimum of five aligned gene pairs to identify likely orthologous  
26 genes in all pairwise-comparisons of the four genomes. Paralogs were identified by self-comparisons of

1 each of the two *Brassica* genomes with SynMap. Then these orthologs and paralogs were grouped into  
2 24,011 homology sets with the ‘OMG!’ program (Zheng et al. 2011). Every homology set consists of 1-3  
3 *Brassica* paralogs from each of the three *Brassica* genomes and a single *Arabidopsis* gene from each of  
4 the two *Arabidopsis* genomes, representing one “candidate gene” in the reconstructed ancestral genome.  
5 Among these, 2,178 homology sets contained the maximum of eight genes (one each from the two  
6 *Arabidopsis* genomes and three each from the two *Brassica* genomes).

7         The homology sets were used to retrieve the ancestral gene order from adjacency graph using an  
8 efficient algorithm called Maximum Weight Matching (MWM) (Zheng et al. 2013). We identified all the  
9 gene adjacencies in the four genomes, considering only the genes in the homology sets. Each adjacency  
10 was then weighted according to how many of the 8 possible adjacencies were actually observed. The  
11 MWM produced an optimal set of 10,944 linear contigs containing all 24,001 putative ancestral genes  
12 from the homology sets that included 13,057 of 45,982 total adjacencies in the data set, with the  
13 remaining adjacencies being inconsistent with this optimal set. We used the contigs in the output of the  
14 MWM to reconstruct each of the 5 ancestral chromosomes. There were 34 contigs containing large  
15 proportions of genes originating in two or more of the ancient chromosomes that were discarded, as were  
16 any contigs containing four or fewer genes from a *Brassica* genome. While the 9,712 contigs so omitted  
17 represent 89% of all contigs, they represent only 55% of the genes, leaving a small group of large contigs  
18 with strong synteny relations in our ancestral reconstruction. We next identified adjacencies among the  
19 contigs themselves and applied a second iteration of MWM on them, giving the optimal ordering of those  
20 contigs. Combining these orders with the existing gene order information within each contig yields the  
21 position of all the genes on each ancestral chromosome. This order was mapped to our set of pillars of  
22 TCS, giving a subset of those pillars ordered by this ancestral order estimate.

23

#### 24 *The phylogenetic relationships of the triplicated members of the Brassicaceae*

25         POInT fits the models shown in Figure 2 to the pillar data under an assumed phylogenetic  
26 topology using maximum likelihood, allowing us to use that likelihood statistic to compare different

1 phylogenetic relationships among these four hexaploid taxa. POInT's computational demands were too  
2 great to allow testing all 15 rooted topologies of 4 species (POInT's models are not time reversible).  
3 However, by making the reasonable assumption that *B. rapa* and *B. oleracea* are sister to each other, we  
4 were able to test the three potential relationships of *C. hispanica* and *S. alba* to the two *Brassic*as. Figure  
5 1 gives the maximum likelihood topology: the two alternative topologies and their likelihoods are given in  
6 Supplemental Fig S1.

### 8 *Selective constraints of the retained triplets*

9 We identified 218 pillars that retained triplicated genes across all four genomes and where the  
10 confidence in their subgenome assignments was  $\geq 95\%$ . For each such pillar, the 12 sequences were  
11 aligned using T-coffee (Notredame et al. 2000). The cladogram for each 12 genes consists of three  
12 subtrees grouping four sequences that belong to same subgenome in the same sister group (Supplemental  
13 Fig S4). Then, using codeml in PAML (Yang 2007) with CodonFreq set to F3X4, we inferred three  
14 distinct dN/dS ratios: one for each of the three subtrees deriving from the three parental subgenomes.

### 16 *Functional analysis of single-copy genes from different subgenomes*

17 We performed functional analysis for genes where we have high ( $\geq 95\%$ ) confidence that they  
18 returned to single copy along the common root branch. Using the corresponding “ancestral” locus from *A.*  
19 *thaliana*, we performed individual Gene Ontology analyses with PANTHER (Mi et al. 2019)  
20 Overrepresentation Tests (release date 20190711) for genes from each subgenome. The background list  
21 used in all cases was the loci that remained duplicated or triplicated at the end of the root branch.

### 23 *Protein-protein interaction and metabolic network analysis*

24 The *A. thaliana* protein-protein interaction (PPI) network was downloaded from BioGRID (Stark  
25 et al. 2011; Arabidopsis Interactome Mapping Consortium 2011). The root-branch post-WGT subgenome

1 assignments for each “ancestral” locus represented by an *Arabidopsis* gene were mapped onto the nodes  
2 (gene products) of the PPI network, so long as our confidence in those subgenome assignments was  $\geq$   
3 95%. Similarly, for the extant *B. rapa*, we took loci with high subgenome assignment confidence  $\geq$  95%  
4 and mapped their *A. thaliana* orthologs onto network nodes. The resulting PPI network (Figure 3) was  
5 visualized using Gephi 0.9.2 (Bastian et al. 2009) with the Fruchterman Reingold and Yifan Hu layout  
6 algorithms (Fruchterman and Reingold 1991; Hu 2006). To test whether gene products from the same  
7 subgenome are over-connected in this network, we permuted the subgenome assignments 1,000 times,  
8 holding the network topology unchanged. We then compared the actual number of edges connecting  
9 single copy genes from the same subgenome with the distribution of this value seen in the randomized  
10 networks (Supplemental Fig S6). We also asked whether the ancestral genes corresponding to retained  
11 triplets showed an excess of connections amongst themselves. Because the number of edges between  
12 retained triplets and between single-copy genes are not independent, we performed an additional set of  
13 permutations, in which we held all the triplet rows constant and only shuffled the subgenome assignments  
14 of the remaining nodes.

15 We performed similar analyses using the AraGEM v1.2 metabolic network from *A. thaliana* (de  
16 Oliveira Dal’Molin et al. 2010; Bekaert et al. 2012). In this network, each node represents a biochemical  
17 reaction, and pairs of nodes are connected by edges if their respective reactions share a metabolite. For  
18 each *A. thaliana* gene encoding an enzyme catalyzing one such reaction, we mapped the root-branch  
19 subgenome assignments (again requiring  $\geq$  95% confidence), assigning to that gene three  
20 presence/absence variables (one per subgenome). Then, for each subgenome, we counted the number of  
21 edges between pairs of nodes with at least one pair of single-copy genes from a common subgenome. We  
22 assessed significance by holding the network topology and *Arabidopsis* gene assignments constant and  
23 randomizing the subgenome assignments 1,000 times. We then compared the distributions of the single-  
24 subgenome edge counts from the simulations with the actual values (Supplemental Fig S6).

25

## 1 *Brassica rapa* co-expression network analysis

2 We generated a gene expression dataset for *Brassica rapa* spanning diverse experimental  
3 conditions, including the following: a cold treatment in leaves (4hrs and 28hrs post), methyl jasmonate  
4 treatment in leaves (4hrs and 28hrs post), anaerobic treatment in leaves (4 and 8hrs post), salt treatment in  
5 roots (4hrs and 28hrs post) and a diurnal time course in leaves (every 4hrs, 6 timepoints) in standard light-  
6 dark conditions but also in complete dark and complete light conditions. Total RNA was extracted from  
7 above organs using the Invitrogen Purelink RNA Mini Kit (Carlsbad, CA, USA), converted into a library  
8 using the Illumina TruSeq RNA kit (San Diego, CA, USA), and paired-end 100bp reads were sequenced  
9 on the HiSeq-2000 instrument at the VJC Genomics Sequencing Laboratory at the University of  
10 California, Berkeley. The NextGENe V2.17 (SoftGenetics, State College, PA, USA) software package  
11 was used to remove low-quality Illumina data, map reads to the *B. rapa* FPsc (v1.0, CoGe id 20101)  
12 reference genome, and calculate normalized RPKM (reads per kilobase of transcript per million) values  
13 for all genes.

14 We filtered the dataset to only include genes that were missing a measured expression value for at  
15 most one of the 32 RNAseq libraries, leaving 24,907 *B. rapa* genes in it. The gene identifiers used for the  
16 expression dataset were from the *B. rapa* FPsc (v1.0, CoGe id 20101) reference genome, so we translated  
17 these identifiers to those from *B. rapa* Chiifu (v1.5, id 24668) using CoGe SynMap (Lyons et al. 2008b).  
18 In so doing, we only used *B. rapa* genes with one-to-one matches between the two references. For any  
19 pair of genes in the expression dataset, we calculated the Spearman correlation coefficient of their RPKM  
20 values. A co-expression network was then constructed using highly correlated gene pairs, e.g., pairs  
21 having Spearman correlation coefficients  $\geq 0.9$  (positive correlations), or  $\leq -0.9$  (negative correlations).  
22 Thus, the nodes of this co-expression network are *B. rapa* genes, and the edges represent correlation in  
23 expression. The co-expression network was randomized 100 times by rewiring the edges, while holding  
24 the nodes and their subgenome assignments unchanged. In other words, all edges were broken and  
25 randomly reconnecting, preserving the degree of every node (Pérez-Bercoff et al. 2011). The distributions  
26 of inter-subgenome and intra-subgenome edge counts are shown in Figure 4.

1 *Association between recent selective sweeps in B. rapa and subgenomes*

2 *B. rapa* genes were divided into those in the regions of selective sweeps detected by SweeD  
3 (Pavlidis et al. 2013) in either turnip, toria, Indian sarson, pak choi or Chinese cabbage (vegetable types  
4 of *B. rapa*), and those showing no such signatures (Qi et al. 2017, 2020). We tested whether particular  
5 subgenomes (posterior probability  $\geq 0.95$ ) were unusually likely or unlikely to have experienced a  
6 selective sweep using chi-square test. The association plot as shown in Supplemental Fig S7 was  
7 visualized using the vcd package version 1.4-4 in R 3.6.0 (Meyer et al. 2006; Zeileis et al. 2007).

8  
9 **Data Access**

10 The assembly of the *Crambe hispanica* v1.1 genome is available under NCBI BioProject  
11 PRJNA631330 with accession number JABFOD000000000. The Crambe RNA-seq files are in the NCBI  
12 SRA under project number PRJNA475309. The annotated *Crambe hispanica* v1.1 genome is available  
13 from CoGe (id58014). POInT input files, the inferred ancestral gene orders, POInT models and assumed  
14 phylogenetic trees are available on figshare (<https://doi.org/10.6084/m9.figshare.12277832>) and from the  
15 POInTbrowse portal (<http://wgd.statgen.ncsu.edu/>).

16  
17 **Acknowledgements**

18 This project was supported by U.S. National Science Foundation grant NSF-IOS-1339156 (Y.H.,  
19 M.M., P.P.E., H.A., R.S.A., J.D.W., X.Q., M.B., E.L., J.C.P., and G.C.C.). We would like to thank the  
20 U.S. Department of Energy Joint Genome Institute and the Brassicaceae Map Alignment Project (BMAP)  
21 consortium for allowing us access to the *Sinapis alba* genome. The work conducted by the U.S.  
22 Department of Energy Joint Genome Institute, a DOE Office of Science User Facility, is supported by the  
23 Office of Science of the U.S. Department of Energy under Contract No. DE-AC02-05CH11231. We  
24 would like to thank A. Platts for assistance with our analyses and J. A. Birchler, R. Roberts, J. Thorne and  
25 H. Ashrafi for helpful discussions.

# 1 Figures

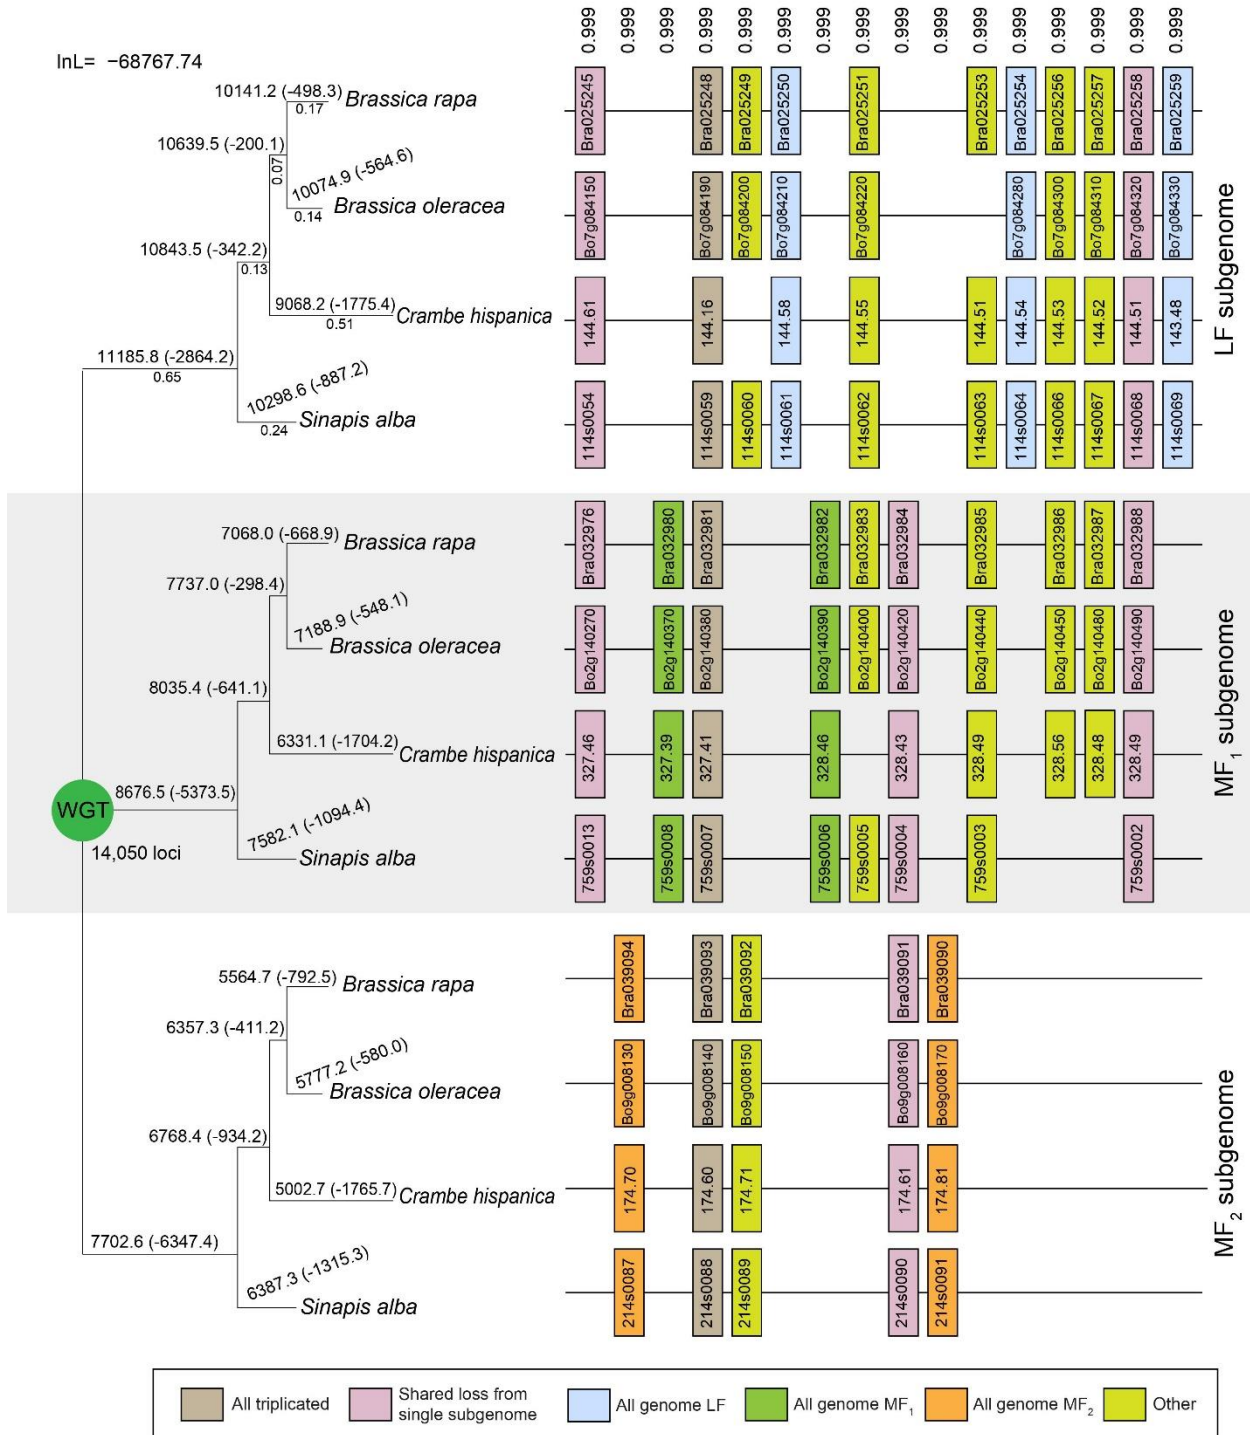

2

1 **Figure 1. Subgenome assignment and inference of gene loss after the shared WGT in four species.**

2 After the WGT, each ancestral locus could potentially expand to three gene copies, but due to biases in  
3 the loss events, the number of surviving genes from the subgenomes are unequal. Our analyses (see  
4 *Results*) indicate the presence of a less fractionated (LF) subgenome and two more fractionated ones  
5 (MF1 and MF2). These inferences are based on the gene losses observed across four genomes and along  
6 the phylogeny depicted. Shown here is a window of 16 post-WGT loci (out of the total 14,050 such loci)  
7 in four species that share the WGT: *Brassica rapa*, *Brassica oleracea*, *Crambe hispanica* and *Sinapis*  
8 *alba*. Each pillar corresponds to an ancestral locus, and the boxes represent extant genes. Pairs of genes  
9 are connected by lines if they are genomic neighbors (e.g., in synteny). The numbers on top of each pillar  
10 are the posterior probabilities assigned to this combination of orthology relationships relative to the other  
11  $(3!)^4 - 1 = 1295$  possible orthology states. The numbers above each branch of the tree give the number of  
12 genes in each subgenome surviving to that point, with the number of gene losses in parentheses. The gene  
13 loss inferences made by POInT are probabilistic: as some gene losses cannot be definitively assigned to a  
14 single branch, the resulting loss estimates are not integers. The numbers below the branches in the first  
15 subtree are POInT's branch length estimates ( $\alpha$ ).



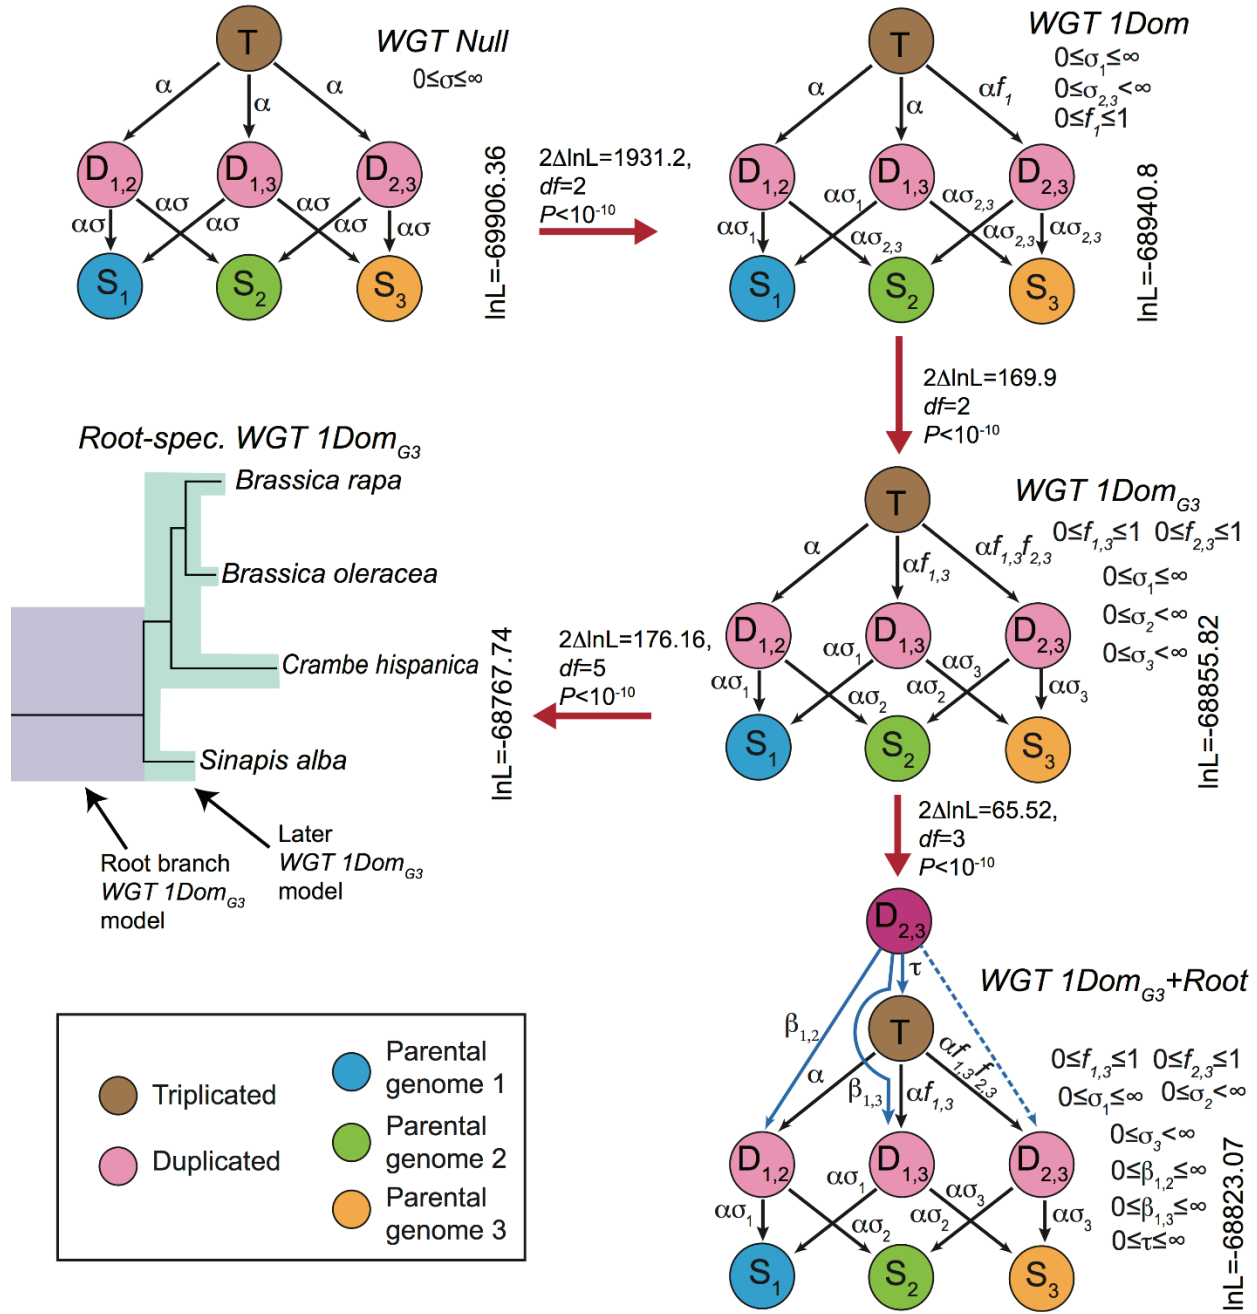

1

1 **Figure 2. POInT's models for inferring WGT.** Five different models of post-WGT evolution and their  
2 ln-likelihoods are shown. In each model, the colored circles represent different states. The brown circle  
3 represents the triplicated state (**T**); the pink circles are duplicated states (**D<sub>1,2</sub>**, **D<sub>1,3</sub>** and **D<sub>2,3</sub>**); the blue,  
4 green and yellow circles are three single-copy states (**S<sub>1</sub>** for the LF subgenome, **S<sub>2</sub>** for the MF1  
5 subgenome and **S<sub>3</sub>** for the MF2 subgenome). The transition rates between states are shown above the  
6 arrows.  $\alpha$ : transition rate from triplicated state to duplicated states;  $\alpha\sigma$ : transition rates from duplicated  
7 states to single copy states;  $f$ : fractionation parameters;  $\beta$  and  $\tau$ : root model parameters. Red arrows  
8 connect pairs of models compared using likelihood ratio tests (see *Methods*). *WGT Null model*: transition  
9 rates are the same across three subgenomes, modeling the scenario of no biased fractionation. *WGT IDom*  
10 *model*: with the biased fractionation parameter  $f_1$  ( $0 \leq f_1 \leq 1$ ), the MF1 and MF2 subgenomes are more  
11 fractionated than LF subgenome. *WGT IDom<sub>G3</sub> model*: two fractionation parameters  $f_{1,3}$  and  $f_{2,3}$  were  
12 introduced, distinguishing the three subgenomes: MF2 is more fractionated than MF1, and MF1 is more  
13 fractionated than LF. *Root-spec. WGT IDom<sub>G3</sub> model*: similar to the previous model, but with two sets of  
14 parameters, one set for the root branch and the other for the remainder of the branches. *WGT IDom<sub>G3</sub> +*  
15 *Root model*: Two-step hexaploidy model created by starting each pillar in an intermediate state **D<sub>2,3</sub>**. This  
16 state represents the merging of the MF1 and MF2 subgenomes as the first step of the hexaploid formation.  
17 The **T**, **D<sub>1,2</sub>**, and **D<sub>1,3</sub>** states represent the second allopolyploidy, with either no prior homoeolog losses (**T**)  
18 or a loss from one of the two MF subgenomes prior to that event (**D<sub>1,2</sub>**, or **D<sub>1,3</sub>**).

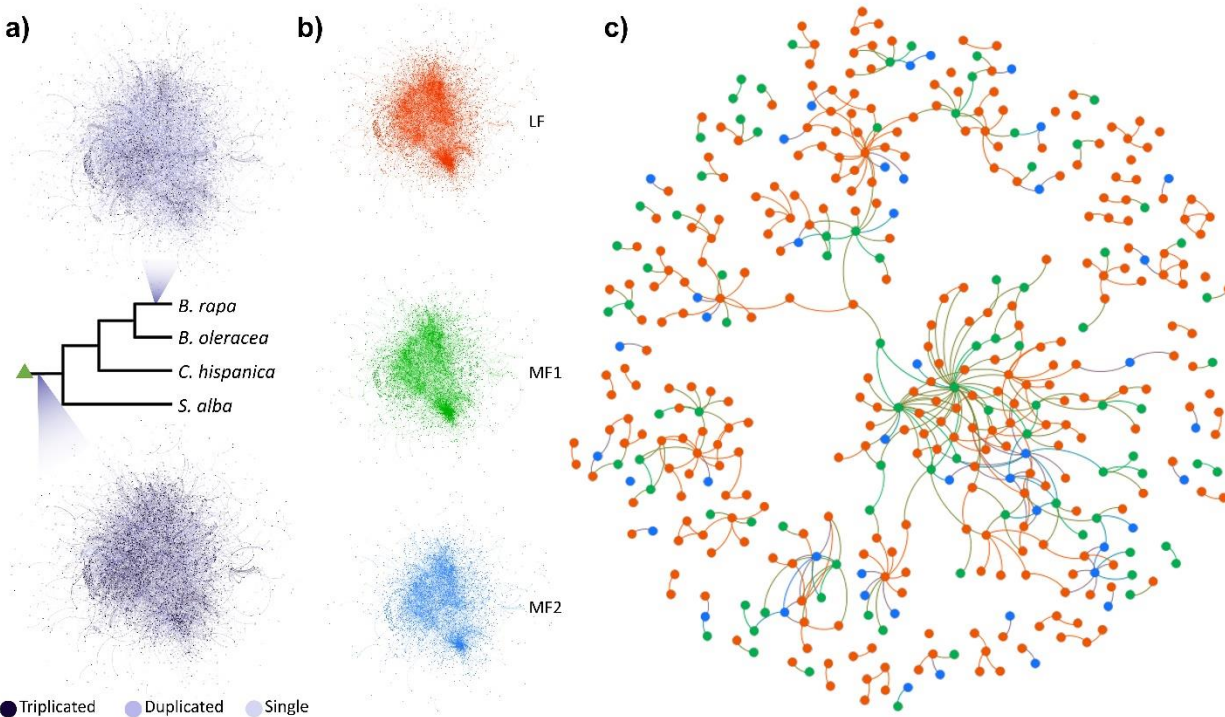

**Figure 3. Protein-protein interaction networks after the WGT.** a) The *Arabidopsis* PPI network at the root branch (bottom) and the same PPI network colored by the *Brassica rapa* gene retention status (top). The dark purple nodes represent retained triplets. b) the PPI network partitioned by subgenome assignment at the root branch. LF subgenome: red - 4,249 nodes and 8,454 edges. MF1 subgenome: green - 3,379 nodes and 6,442 edges. MF2 subgenome: blue - 3,073 nodes and 4,961 edges. c) A subset of the PPI network where only nodes encoded by single copies genes and connected to other single copy nodes are shown. Red nodes are from the LF subgenome, green nodes are from the MF1 subgenome and blue nodes are from the MF2 subgenome.

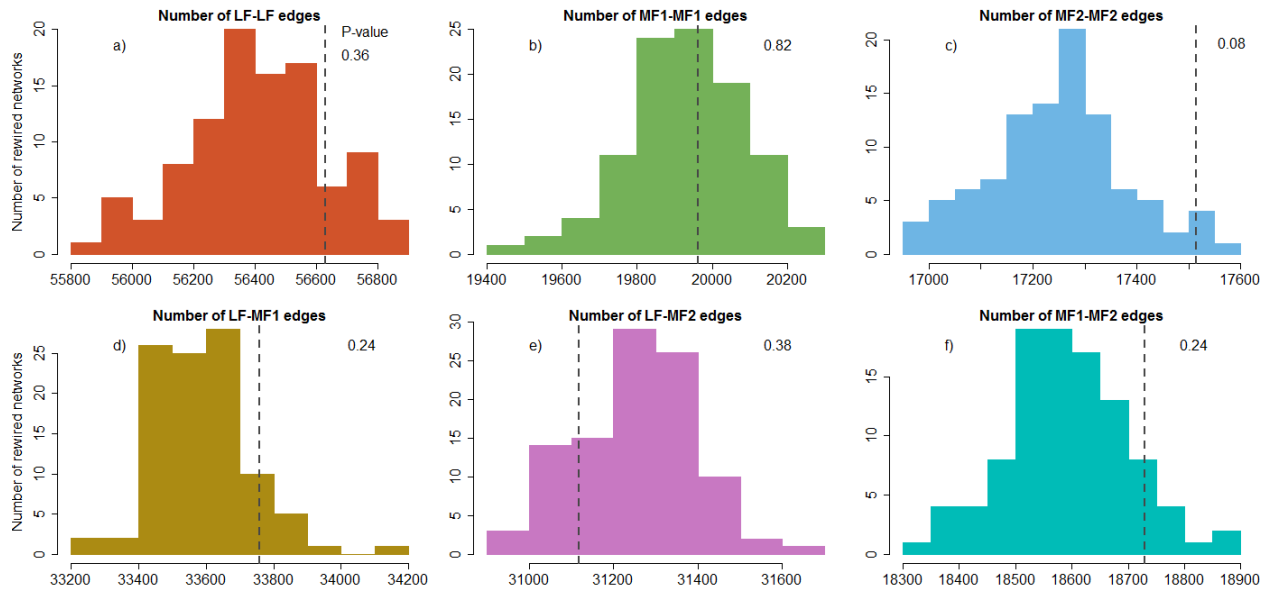

1

2

3 **Figure 4. Subgenome-specific edge counts for 100 rewired *Brassica rapa* co-expression networks**

4 **compared to those from the actual network.** a) Distribution of the number of edges connecting pairs of

5 *B. rapa* genes both from the LF subgenome in 100 rewired networks. b) Distribution of the number of

6 edges connecting pairs of genes both from the MF1 subgenome. c) Distribution of the number of edges

7 connecting pairs of genes both from the MF2 subgenome. d) Distribution of the number of edges

8 connecting LF genes to MF1 genes. e) Distribution of the number of edges connecting LF genes to MF2

9 genes. f) Distribution of the number of edges connecting MF1 and MF2 genes. In each panel, the dark

10 grey dashed line shows the number of edges with that set of subgenomes assignments for the true

11 network.

12

13

14

15

16

## 1   **References**

- 2   Alger EI, Edger PP. 2020. One subgenome to rule them all: underlying mechanisms of subgenome  
3       dominance. *Curr Opin Plant Biol* **54**: 108–113.
- 4   Alix K, Gérard PR, Schwarzacher T, Heslop-Harrison JSP. 2017. Polyploidy and interspecific  
5       hybridization: Partners for adaptation, speciation and evolution in plants. *Ann Bot* **120**: 183–194.
- 6   Arabidopsis Interactome Mapping Consortium. 2011. Evidence for Network Evolution in an Arabidopsis  
7       Interactome Map. *Science* **333**: 988–993.
- 8   Arias T, Pires JC. 2012. A fully resolved chloroplast phylogeny of the brassica crops and wild relatives  
9       (Brassicaceae: Brassiceae): Novel clades and potential taxonomic implications. *Taxon* **61**: 980–988.
- 10   Aury JM, Jaillon O, Duret L, Noel B, Jubin C, Porcel BM, Ségurens B, Daubin V, Anthouard V, Aiach N,  
11       et al. 2006. Global trends of whole-genome duplications revealed by the ciliate Paramecium  
12       tetraurelia. *Nature* **444**: 171–178.
- 13   Bao W, Kojima KK, Kohany O. 2015. Repbase Update, a database of repetitive elements in eukaryotic  
14       genomes. *Mob DNA* **6**: 11.
- 15   Bastian M, Heymann S, Jacomy M. 2009. Gephi: An open source software for exploring and  
16       manipulating networks. BT - International AAAI Conference on Weblogs and Social. *Int AAAI Conf*  
17       *Weblogs Soc Media* 361–362.
- 18   Bekaert M, Edger PP, Hudson CM, Pires JC, Conant GC. 2012. Metabolic and evolutionary costs of  
19       herbivory defense: Systems biology of glucosinolate synthesis. *New Phytol* **196**: 596–605.
- 20   Birchler JA, Johnson AF, Veitia RA. 2016. Kinetics genetics: Incorporating the concept of genomic  
21       balance into an understanding of quantitative traits. *Plant Sci* **245**: 128–134.
- 22   Birchler JA, Riddle NC, Auger DL, Veitia RA. 2005. Dosage balance in gene regulation: biological  
23       implications. *Trends Genet* **21**: 219–226.
- 24   Birchler JA, Veitia RA. 2012. Gene balance hypothesis: connecting issues of dosage sensitivity across  
25       biological disciplines. *Proc Natl Acad Sci U S A* **109**: 14746–14753.
- 26   Birchler JA, Veitia RA. 2014. The gene balance hypothesis: dosage effects in plants. In *Plant Epigenetics*  
27       *and Epigenomics: Methods and Protocols*, pp. 25–32, Humana Press, Totowa, NJ.
- 28   Birchler JA, Veitia RA. 2007. The gene balance hypothesis: from classical genetics to modern genomics.  
29       *Plant Cell* **19**: 395–402.
- 30   Bird KA, VanBuren R, Puzey JR, Edger PP. 2018. The causes and consequences of subgenome  
31       dominance in hybrids and recent polyploids. *New Phytol* **220**: 87–93.
- 32   Blanc-Mathieu R, Perfus-Barbeoch L, Aury JM, Da Rocha M, Gouzy J, Sallet E, Martin-Jimenez C,  
33       Bailly-Bechet M, Castagnone-Sereno P, Flot JF, et al. 2017. Hybridization and polyploidy enable  
34       genomic plasticity without sex in the most devastating plant-parasitic nematodes. *PLoS Genet* **13**: 1–  
35       36.

- 1 Blanc G, Wolfe KH. 2004. Functional divergence of duplicated genes formed by polyploidy during  
2 Arabidopsis evolution. *Plant Cell* **16**: 1679–1691.
- 3 Campbell MS, Law MY, Holt C, Stein JC, Moghe GD, Hufnagel DE, Lei J, Achawanantakun R, Jiao D,  
4 Lawrence CJ, et al. 2014. MAKER-P: A Tool kit for the rapid creation, management, and quality  
5 control of plant genome annotations. *Plant Physiol* **164**: 513–524.
- 6 Carlsson AS, Clayton D, Salentijn E, Toonen M. 2007. *Oil crop platforms for industrial uses*.  
7 [www.cplbookshop.com](http://www.cplbookshop.com).
- 8 Cheng CY, Krishnakumar V, Chan AP, Thibaud-Nissen F, Schobel S, Town CD. 2017. Araport11: a  
9 complete reannotation of the Arabidopsis thaliana reference genome. *Plant J* **89**: 789–804.
- 10 Cheng F, Wu J, Fang L, Sun S, Liu B, Lin K, Bonnema G, Wang X. 2012. Biased gene fractionation and  
11 dominant gene expression among the subgenomes of Brassica rapa. *PLoS One* **7**: e36442.
- 12 Cheng F, Wu J, Liang J, Wang X. 2014. Genome triplication drove the diversification of Brassica plants.  
13 *Hortic Res* **1**: 14024.
- 14 Codoñer FM, Fares MA. 2008. Why should we care about molecular coevolution? *Evol Bioinforma* **2008**:  
15 237–246.
- 16 Conant GC. 2014. Comparative genomics as a time machine: How relative gene dosage and metabolic  
17 requirements shaped the time-dependent resolution of yeast polyploidy. *Mol Biol Evol* **31**: 3184–  
18 3193.
- 19 Conant GC, Birchler JA, Pires JC. 2014. Dosage, duplication, and diploidization: Clarifying the interplay  
20 of multiple models for duplicate gene evolution over time. *Curr Opin Plant Biol* **19**: 91–98.
- 21 Conant GC, Wagner A. 2002. GenomeHistory: a software tool and its application to fully sequenced  
22 genomes. *Nucleic Acids Res* **30**: 3378–3386.
- 23 Conant GC, Wolfe KH. 2006. Functional partitioning of yeast co-expression networks after genome  
24 duplication. *PLoS Biol* **4**: e109.
- 25 Conant GC, Wolfe KH. 2007. Increased glycolytic flux as an outcome of whole-genome duplication in  
26 yeast. *Mol Syst Biol* **3**: 129.
- 27 Conant GC, Wolfe KH. 2008a. Probabilistic cross-species inference of orthologous genomic regions  
28 created by whole-genome duplication in yeast. *Genetics* **179**: 1681–1692.
- 29 Conant GC, Wolfe KH. 2008b. Turning a hobby into a job: How duplicated genes find new functions. *Nat*  
30 *Rev Genet* **9**: 938–950.
- 31 Costello R, Emms DM, Kelly S. 2019. Gene Duplication Accelerates the Pace of Protein Gain and Loss  
32 from Plant Organelles. *Mol Biol Evol* **37**: 969–981.
- 33 de Oliveira Dal’Molin CG, Quek LE, Palfreyman RW, Brumbley SM, Nielsen LK. 2010. AraGEM, a  
34 genome-scale reconstruction of the primary metabolic network in Arabidopsis. *Plant Physiol* **152**:  
35 579–589.
- 36 De Smet R, Adams KL, Vandepoele K, Van Montagu MCE, Maere S, Van de Peer Y. 2013. Convergent

- 1 gene loss following gene and genome duplications creates single-copy families in flowering plants.  
2 *Proc Natl Acad Sci U S A* **110**: 2898–2903.
- 3 Edger PP, Heidel-Fischer HM, Bekaert M, Rota J, Glöckner G, Platts AE, Heckel DG, Der JP, Wafula  
4 EK, Tang M, et al. 2015. The butterfly plant arms-race escalated by gene and genome duplications.  
5 *Proc Natl Acad Sci* **112**: 8362–8366.
- 6 Edger PP, Smith RD, McKain MR, Cooley AM, Vallejo-Marin M, Yuan Y-W, Bewick AJ, Ji L, Platts  
7 AE, Bowman MJ, et al. 2017. Subgenome dominance in an interspecific hybrid, synthetic  
8 allopolyploid, and a 140-year-old naturally established neo-allopolyploid monkeyflower. *Plant Cell*  
9 **29**: 2150–2167.
- 10 Emery M, Willis MMS, Hao Y, Barry K, Oakgrove K, Peng Y, Schmutz J, Lyons E, Pires JC, Edger PP,  
11 et al. 2018. Preferential retention of genes from one parental genome after polyploidy illustrates the  
12 nature and scope of the genomic conflicts induced by hybridization. *PLoS Genet* **14**: e1007267.
- 13 Evangelisti AM, Conant GC. 2010. Nonrandom survival of gene conversions among yeast ribosomal  
14 proteins duplicated through genome doubling. *Genome Biol Evol* **2**: 826–834.
- 15 Freeling M. 2009. Bias in plant gene content following different sorts of duplication: Tandem, whole-  
16 genome, segmental, or by transposition. *Annu Rev Plant Biol* **60**: 433–453.
- 17 Freeling M, Woodhouse MR, Subramaniam S, Turco G, Lisch D, Schnable JC. 2012. Fractionation  
18 mutagenesis and similar consequences of mechanisms removing dispensable or less-expressed DNA  
19 in plants. *Curr Opin Plant Biol* **15**: 131–139.
- 20 Fruchterman TMJ, Reingold EM. 1991. Graph Drawing by Force-directed Placement. *Softw Pract Exp*  
21 **21**: 1129–1164.
- 22 Gong L, Salmon A, Yoo MJ, Grupp KK, Wang Z, Paterson AH, Wendel JF. 2012. The cytonuclear  
23 dimension of allopolyploid evolution: An example from cotton using rubisco. *Mol Biol Evol* **29**:  
24 3023–3036.
- 25 Goodstein DM, Shu S, Howson R, Neupane R, Hayes RD, Fazo J, Mitros T, Dirks W, Hellsten U,  
26 Putnam N, et al. 2012. Phytozome: A comparative platform for green plant genomics. *Nucleic Acids*  
27 *Res* **40**: 1178–1186.
- 28 Hakes L, Pinney JW, Lovell SC, Oliver SG, Robertson DL. 2007. All duplicates are not equal: The  
29 difference between small-scale and genome duplication. *Genome Biol* **8**: R209.
- 30 Hollister JD. 2015. Polyploidy: Adaptation to the genomic environment. *New Phytol* **205**: 1034–1039.
- 31 Hu Y. 2006. Efficient, High-Quality Force-Directed Graph Drawing. *Math J* **10**: 37–71.
- 32 Kacser H, Burns JA. 1981. The molecular basis of dominance. *Genetics* **97**: 639–666.
- 33 Kirkpatrick S, Gelatt CDJ, Vecchi MP. 1983. Optimization by simulated annealing. *Science* **220**: 671–  
34 680.
- 35 Koren S, Walenz BP, Berlin K, Miller JR, Bergman NH, Phillippy AM. 2017. Canu: scalable and  
36 accurate long-read assembly via adaptive k-mer weighting and repeat separation. *Genome Res* **27**:

- 1           722–736.
- 2   Korf I. 2004. Gene finding in novel genomes. *BMC Bioinformatics* **5**: 59.
- 3   Lagercrantz U. 1998. Comparative mapping between *Arabidopsis thaliana* and *Brassica nigra* indicates  
4           that *Brassica* genomes have evolved through extensive genome replication accompanied by  
5           chromosome fusions and frequent rearrangements. *Genetics* **150**: 1217–1228.
- 6   Langmead B, Salzberg SL. 2012. Fast gapped-read alignment with Bowtie 2. *Nat Methods* **9**: 357–359.
- 7   Lazzeri L, De Mattei F, Bucelli F, Palmieri S. 1997. Crambe oil - A potential new hydraulic oil and  
8           quenchant. *Ind Lubr Tribol* **49**: 71–77.
- 9   Liang Z, Schnable JC. 2018. Functional divergence between subgenomes and gene pairs after whole  
10          genome duplications. *Mol Plant* **11**: 388–397.
- 11   Liu S, Liu Y, Yang X, Tong C, Edwards D, Parkin IA, Zhao M, Ma J, Yu J, Huang S, et al. 2014. The  
12          *Brassica oleracea* genome reveals the asymmetrical evolution of polyploid genomes. *Nat Commun*  
13          **5**: 3930.
- 14   Lukens LN, Quijada PA, Udall J, Pires JC, Schranz ME, Osborn TC. 2004. Genome redundancy and  
15          plasticity within ancient and recent *Brassica* crop species. *Biol J Linn Soc* **82**: 665–674.
- 16   Lyons E, Freeling M. 2008. How to usefully compare homologous plant genes and chromosomes as DNA  
17          sequences. *Plant J* **53**: 661–673.
- 18   Lyons E, Pedersen B, Kane J, Alam M, Ming R, Tang H, Wang X, Bowers J, Paterson A, Lisch D, et al.  
19          2008a. Finding and comparing syntenic regions among *Arabidopsis* and the outgroups papaya,  
20          poplar, and grape: CoGe with rosids. *Plant Physiol* **148**: 1772–1781.
- 21   Lyons E, Pedersen B, Kane J, Freeling M. 2008b. The value of nonmodel genomes and an example using  
22          SynMap within CoGe to dissect the hexaploidy that predates the rosids. *Trop Plant Biol* **1**: 181–190.
- 23   Lysak MA. 2009. Comparative cytogenetics of wild crucifers (Brassicaceae). In *Biology and Breeding of*  
24          *Crucifers* (ed. S.K. Gupta), pp. 177–205, CRC Press Taylor & Francis Group, Boca Raton London  
25          New York.
- 26   Lysak MA, Koch MA, Pecinka A, Schubert I. 2005. Chromosome triplication found across the tribe  
27          Brassicaceae. *Genome Res* **15**: 516–525.
- 28   Maere S, Bodt S De, Raes J, Casneuf T, Montagu M Van, Kuiper M, Peer Y Van de. 2005. Modeling  
29          gene and genome duplications in eukaryotes. *Proc Natl Acad Sci* **102**: 5454–5459.
- 30   Makino T, McLysaght A. 2010. Ohnologs in the human genome are dosage balanced and frequently  
31          associated with disease. *Proc Natl Acad Sci* **107**: 9270–9274.
- 32   Makino T, McLysaght A. 2012. Positionally biased gene loss after whole genome duplication: Evidence  
33          from human, yeast, and plant. *Genome Res* **22**: 2427–2435.
- 34   McClintock B. 1984. The significance of responses of the genome to challenge. *Science* **226**: 792–801.
- 35   Merico A, Sulo P, Piškur J, Compagno C. 2007. Fermentative lifestyle in yeasts belonging to the



- 1 Saccharomyces complex. *FEBS J* **274**: 976–989.
- 2 Meyer D, Zeileis A, Hornik K. 2006. The strucplot framework: Visualizing multi-way contingency tables  
3 with vcd. *J Stat Softw* **17**: 1–48.
- 4 Mi H, Muruganujan A, Ebert D, Huang X, Thomas PD. 2019. PANTHER version 14: More genomes, a  
5 new PANTHER GO-slim and improvements in enrichment analysis tools. *Nucleic Acids Res* **47**:  
6 D419–D426.
- 7 Notredame C, Higgins DG, Heringa J. 2000. T-coffee: A novel method for fast and accurate multiple  
8 sequence alignment. *J Mol Biol* **302**: 205–217.
- 9 Ohno S. 1970. *Evolution by Gene Duplication*. Springer, Verlag Berlin Heidelberg.
- 10 One Thousand Plant Transcriptomes Initiative. 2019. One thousand plant transcriptomes and the  
11 phylogenomics of green plants. *Nature* **574**.
- 12 Parkin IAP, Gulden SM, Sharpe AG, Lukens L, Trick M, Osborn TC, Lydiate DJ. 2005. Segmental  
13 structure of the Brassica napus genome based on comparative analysis with Arabidopsis thaliana.  
14 *Genetics* **171**: 765–781.
- 15 Parkin IAP, Koh C, Tang H, Robinson SJ, Kagale S, Clarke WE, Town CD, Nixon J, Krishnakumar V,  
16 Bidwell SL, et al. 2014. Transcriptome and methylome profiling reveals relics of genome  
17 dominance in the mesopolyploid Brassica oleracea. *Genome Biol* **15**: R77.
- 18 Paterson AH. 2005. Polyploidy, evolutionary opportunity, and crop adaptation. In *Genetics of Adaptation*  
19 (ed. R. Mauricio), pp. 191–196, Springer Netherlands, Dordrecht.
- 20 Pavlidis P, Živković D, Stamatakis A, Alachiotis N. 2013. SweeD: Likelihood-based detection of  
21 selective sweeps in thousands of genomes. *Mol Biol Evol* **30**: 2224–2234.
- 22 Pérez-Bercoff Å, McLysaght A, Conant GC. 2011. Patterns of indirect protein interactions suggest a  
23 spatial organization to metabolism. *Mol BioSyst* **7**.
- 24 Pertea M, Pertea GM, Antonescu CM, Chang T-C, Mendell JT, Salzberg SL. 2015. StringTie enables  
25 improved reconstruction of a transcriptome from RNA-seq reads. *Nat Biotechnol* **33**: 290–295.
- 26 Qi X, An H, Hall TE, Di C, Blischak PD, McKibben MTW, Hao Y, Conant GC, Pires JC, Barker MS.  
27 2020. Genes derived from ancient polyploidy have higher genetic diversity and are associated with  
28 domestication in Brassica rapa. *bioRxiv*.
- 29 Qi X, An H, Ragsdale AP, Hall TE, Gutenkunst RN, Pires JC, Barker MS. 2017. Genomic inferences of  
30 domestication events are corroborated by written records in Brassica rapa. *Mol Ecol* **26**: 3373–3388.
- 31 Qiu Y, Tay Y Van, Ruan Y, Adams KL. 2020. Divergence of duplicated genes by repeated partitioning of  
32 splice forms and subcellular localization. *New Phytol* **225**: 1011–1022.
- 33 Renny-Byfield S, Gong L, Gallagher JP, Wendel JF. 2015. Persistence of subgenomes in paleopolyploid  
34 cotton after 60 my of evolution. *Mol Biol Evol* **32**: 1063–1071.
- 35 Rudloff E, Wang Y. 2011. Crambe. In *Wild Crop Relatives: Genomic and Breeding Resources: Oilseeds*  
36 (ed. C. Kole), pp. 97–116, Springer, Heidelberg Dordrecht London New York.

- 1 Scannell DR, Frank AC, Conant GC, Byrne KP, Woolfit M, Wolfe KH. 2007. Independent sorting-out of  
2 thousands of duplicated gene pairs in two yeast species descended from a whole-genome  
3 duplication. *Proc Natl Acad Sci U S A* **104**: 8397–8402.
- 4 Schnable JC, Springer NM, Freeling M. 2011. Differentiation of the maize subgenomes by genome  
5 dominance and both ancient and ongoing gene loss. *Proc Natl Acad Sci* **108**: 4069–4074.
- 6 Schoonmaker A, Hao Y, McK. Bird DM, Conant GC. 2020. A single, shared triploidy in three species of  
7 parasitic nematodes. *G3-Genes Genom Genet* **10**: 225–233.
- 8 Schranz ME, Lysak MA, Mitchell-Olds T. 2006. The ABC's of comparative genomics in the  
9 Brassicaceae: building blocks of crucifer genomes. *Trends Plant Sci* **11**: 535–542.
- 10 Scienski K, Fay JC, Conant GC. 2015. Patterns of gene conversion in duplicated yeast histones suggest  
11 strong selection on a coadapted macromolecular complex. *Genome Biol Evol* **7**: 3249–3258.
- 12 Seoighe C, Wolfe KH. 1998. Extent of genomic rearrangement after genome duplication in yeast. *Proc*  
13 *Natl Acad Sci U S A* **95**: 4447–4452.
- 14 Sharbrough J, Conover JL, Tate JA, Wendel JF, Sloan DB. 2017. Cytonuclear responses to genome  
15 doubling. *Am J Bot* **104**: 1277–1280.
- 16 Simão FA, Waterhouse RM, Ioannidis P, Kriventseva E V., Zdobnov EM. 2015. BUSCO: Assessing  
17 genome assembly and annotation completeness with single-copy orthologs. *Bioinformatics* **31**:  
18 3210–3212.
- 19 Smit A, Hubley R, Green P. 2015. RepeatMasker. <http://www.repeatmasker.org/>.
- 20 Smukowski Heil CS, DeSevo CG, Pai DA, Tucker CM, Hoang ML, Dunham MJ. 2017. Loss of  
21 Heterozygosity Drives Adaptation in Hybrid Yeast. *Mol Biol Evol* **34**: 1596–1612.
- 22 Soltis PS, Soltis DE. 2012. *Polyploidy and Genome Evolution*. Springer-Verlag, Berlin Heidelberg.
- 23 Stanke M, Waack S. 2003. Gene prediction with a hidden Markov model and a new intron submodel.  
24 *Bioinformatics* **19**: 215–225.
- 25 Stark C, Breitkreutz BJ, Chatr-Aryamontri A, Boucher L, Oughtred R, Livstone MS, Nixon J, Van Auken  
26 K, Wang X, Shi X, et al. 2011. The BioGRID Interaction Database: 2011 update. *Nucleic Acids Res*  
27 **39**: 698–704.
- 28 Sukeena JM, Galicia CA, Wilson JD, McGinn T, Boughman JW, Robison BD, Postlethwait JH, Braasch  
29 I, Stenkamp DL, Fuerst PG. 2016. Characterization and Evolution of the Spotted Gar Retina. *J Exp*  
30 *Zool Part B Mol Dev Evol* **326**: 403–421.
- 31 Tang H, Woodhouse MR, Cheng F, Schnable JC, Pedersen BS, Conant G, Wang X, Freeling M, Pires JC.  
32 2012. Altered patterns of fractionation and exon deletions in *Brassica rapa* support a two-step model  
33 of paleohexaploidy. *Genetics* **190**: 1563–1574.
- 34 Thomas BC, Pedersen B, Freeling M. 2006. Following tetraploidy in an Arabidopsis ancestor, genes were  
35 removed preferentially from one homeolog leaving clusters enriched in dose-sensitive genes.  
36 *Genome Res* **16**: 934–946.

- 1 Van de Peer Y, Maere S, Meyer A. 2009. The evolutionary significance of ancient genome duplications.  
2 *Nat Rev Genet* **10**: 725–732.
- 3 Van de Peer Y, Mizrachi E, Marchal K. 2017. The evolutionary significance of polyploidy. *Nat Rev*  
4 *Genet* **18**: 411–424.
- 5 van Hoek MJA, Hogeweg P. 2009. Metabolic adaptation after whole genome duplication. *Mol Biol Evol*  
6 **26**: 2441–2453.
- 7 Walker BJ, Abeel T, Shea T, Priest M, Abouelliel A, Sakthikumar S, Cuomo CA, Zeng Q, Wortman J,  
8 Young SK, et al. 2014. Pilon: An integrated tool for comprehensive microbial variant detection and  
9 genome assembly improvement. *PLoS One* **9**: e112963.
- 10 Wang X, Wang H, Wang J, Sun R, Wu J, Liu S, Bai Y, Mun J-H, Bancroft I, Cheng F, et al. 2011. The  
11 genome of the mesopolyploid crop species *Brassica rapa*. *Nat Genet* **43**: 1035–1039.
- 12 Warwick SI, Gugel RK. 2003. Genetic variation in the *Crambe abyssinica* - *C. hispanica* - *C. glabrata*  
13 complex. *Genet Resour Crop Evol* **50**: 291–305.
- 14 Wendel JF, Lisch D, Hu G, Mason AS. 2018. The long and short of doubling down: polyploidy,  
15 epigenetics, and the temporal dynamics of genome fractionation. *Curr Opin Genet Dev* **49**: 1–7.
- 16 Wick RR, Schultz MB, Zobel J, Holt KE. 2015. Bandage: Interactive visualization of de novo genome  
17 assemblies. *Bioinformatics* **31**: 3350–3352.
- 18 Wolfe KH, Shields DC. 1997. Molecular evidence for an ancient duplication of the entire yeast genome.  
19 *Nature* **387**: 708–713.
- 20 Woodhouse MR, Cheng F, Pires JC, Lisch D, Freeling M, Wang X. 2014. Origin, inheritance, and gene  
21 regulatory consequences of genome dominance in polyploids. *Proc Natl Acad Sci U S A* **111**: 5283–  
22 5288.
- 23 Xie T, Zhang F-G, Zhang H-Y, Wang X-T, Hu J-H, Wu X-M. 2019. Biased gene retention during  
24 diploidization in *Brassica* linked to three-dimensional genome organization. *Nat Plants* **5**: 822–832.
- 25 Yang Z. 2007. PAML 4: Phylogenetic analysis by maximum likelihood. *Mol Biol Evol* **24**: 1586–1591.
- 26 Yoo M-J, Liu X, Pires JC, Soltis PS, Soltis DE. 2014. Nonadditive Gene Expression in Polyploids. *Annu*  
27 *Rev Genet* **48**: 485–517.
- 28 Zeileis A, Meyer D, Hornik K. 2007. Residual-based shadings for visualizing (conditional) independence.  
29 *J Comput Graph Stat* **16**: 507–525.
- 30 Zhao M, Zhang B, Lisch D, Ma J. 2017. Patterns and consequences of subgenome differentiation provide  
31 insights into the nature of paleopolyploidy in plants. *Plant Cell* **29**: 2974–2994.
- 32 Zheng C, Chen E, Albert VA, Lyons E, Sankoff D. 2013. Ancient eudicot hexaploidy meets ancestral  
33 eurosid gene order. *BMC Genomics* **14**: S3.
- 34 Zheng C, Swenson K, Lyons E, Sankoff D. 2011. OMG! Orthologs in Multiple Genomes – Competing  
35 Graph-Theoretical Formulations. In *International Workshop on Algorithms in Bioinformatics*, pp.  
36 364–375.

## Supplemental Information

### The Contributions from the Progenitor Genomes of the Mesopolyploid Brassiceae are Evolutionarily Distinct but Functionally Compatible

Yue Hao<sup>1</sup>, Makenzie E. Mabry<sup>2</sup>, Patrick P. Edger<sup>3,4</sup>, Michael Freeling<sup>5</sup>, Chunfang Zheng<sup>6</sup>, Lingling Jin<sup>7</sup>, Robert VanBuren<sup>3,8</sup>, Marivi Colle<sup>3</sup>, Hong An<sup>2</sup>, R. Shawn Abrahams<sup>2</sup>, Jacob D. Washburn<sup>9</sup>, Xinshuai Qi<sup>10</sup>, Kerrie Barry<sup>11</sup>, Christopher Daum<sup>11</sup>, Shengqiang Shu<sup>11</sup>, Jeremy Schmutz<sup>11,12</sup>, David Sankoff<sup>6</sup>, Michael S. Barker<sup>10</sup>, Eric Lyons<sup>13</sup>, J. Chris Pires<sup>2,14</sup> and Gavin C. Conant<sup>1,15,16,17</sup>

**Supplemental Table S1.** Model optimization and likelihoods.

**Supplemental Fig S1.** Final ln likelihoods of three different topologies of the four species *B. rapa*, *B. oleracea*, *S. alba* and *C. hispanica*.

**Supplemental Fig S2.** Shared synteny blocks across four genomes.

**Supplemental Fig S3.** Species-specific and shared posterior probabilities of all 14,050 loci.

**Supplemental Fig S4.** Selective constraints of retained triplets partitioned into subgenomes.

**Supplemental Fig S5.** PANTHER Biological Processes and Molecular Functions for the Arabidopsis orthologs of genes that returned to single copy at the root branch with  $FDR \geq 0.05$ .

**Supplemental Fig S6.** Number of edges connecting nodes with single copy genes that are from the same subgenome in both protein-protein interaction network and metabolic network.

**Supplemental Fig S7.** *Brassica rapa* subgenome assignment and genes under selective sweep.

## Supplemental Table S1. Model optimization and likelihoods.

| Test for         | Order              | Model                                             | Topology               | Total breaks in dataset | Final ln likelihood |
|------------------|--------------------|---------------------------------------------------|------------------------|-------------------------|---------------------|
| Orders           | FourSpp_M0Opt4     | WGT_3rate_G1Dom_mo del                            | BrBoSaCh_Top3          | 5236                    | -68852.05           |
|                  | FourSpp_M1Opt1     | WGT_3rate_G1Dom_mo del                            | BrBoSaCh_Top3          | 5236                    | -68852.05           |
|                  | FourSpp_M2Opt3     | WGT_3rate_G1Dom_mo del                            | BrBoSaCh_Top3          | 5237                    | -68856.80           |
|                  | FourSpp_M0Opt3     | WGT_3rate_G1Dom_mo del                            | BrBoSaCh_Top3          | 5255                    | -68870.21           |
| Ancestral orders | FourSpp_An NCTEST  | WGT_3rate_G1Dom_mo del                            | BrBoSaCh_Top3          | 16854                   | -44505.97           |
|                  | FourSpp_An cM1Opt2 | WGT_3rate_G1Dom_mo del                            | BrBoSaCh_Top3          | 13627                   | -43049.68           |
|                  | FourSpp_An cM0Opt2 | WGT_3rate_G1Dom_mo del                            | BrBoSaCh_Top3          | 13870                   | -43163.99           |
| Topologies       | FourSpp_M2Opt3     | WGT_3rate_G1Dom_mo del                            | BrBoSaCh_Top2          | 5237                    | -69855.10           |
|                  | FourSpp_M2Opt3     | WGT_3rate_G1Dom_mo del                            | BrBoSaCh_Top3          | 5237                    | <b>-68855.82</b>    |
|                  | FourSpp_M2Opt3     | WGT_3rate_G1Dom_mo del                            | BrBoSaCh_Top1          | 5237                    | -69653.03           |
| Models           | FourSpp_M2Opt3     | WGT_Triple_Loss_model (Null_model)                | BrBoSaCh_Top2          | 5237                    | -71007.55           |
|                  | FourSpp_M2Opt3     | WGT_Triple_Loss_model (Null_model)                | BrBoSaCh_Top3          | 5237                    | <b>-69906.36</b>    |
|                  | FourSpp_M2Opt3     | WGT_Triple_W_DominantGenome                       | BrBoSaCh_Top3          | 5237                    | -69074.34           |
|                  | FourSpp_M2Opt3     | WGT_2rate_G1Dom_mo del                            | BrBoSaCh_Top3          | 5237                    | <b>-68940.78</b>    |
| Root models      | FourSpp_M2Opt3     | WGT_3rate_G1Dom_brnspec_model                     | BrBoSaCh_Top3_RootSpec | 5237                    | <b>-68767.74</b>    |
|                  | FourSpp_M2Opt3     | WGT_3rate_G1Dom_mo del<br>r: WGT_RootModel_LF     | BrBoSaCh_Top3          | 5237                    | <b>-68823.07</b>    |
|                  | FourSpp_M2Opt3     | WGT_3rate_G1Dom_mo del<br>r:<br>WGT_RootModel_MF1 | BrBoSaCh_Top3          | 5237                    | -68843.19           |
|                  | FourSpp_M2Opt3     | WGT_3rate_G1Dom_mo del<br>r:<br>WGT_RootModel_MF2 | BrBoSaCh_Top3          | 5237                    | -68847.01           |

## Supplemental Figures

a) Topology 1  $lnL = -69653.0268$

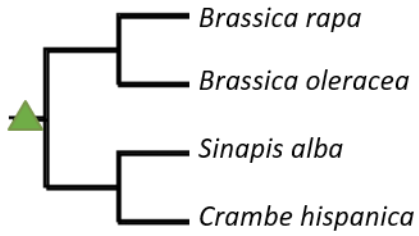

b) Topology 2  $lnL = -69855.1045$

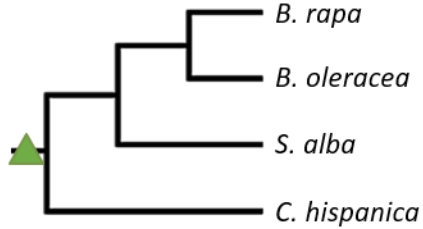

c) Topology 3  $lnL = -68855.8248$

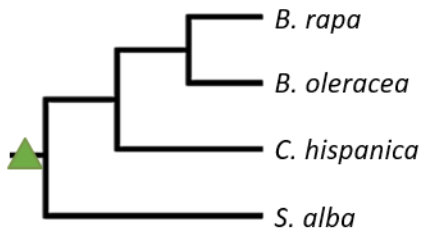

**Supplemental Fig S1.** Final  $ln$  likelihoods of three different topologies of the four species *B. rapa*, *B. oleracea*, *S. alba* and *C. hispanica*. The triangle indicates shared hexaploidy ancestry.

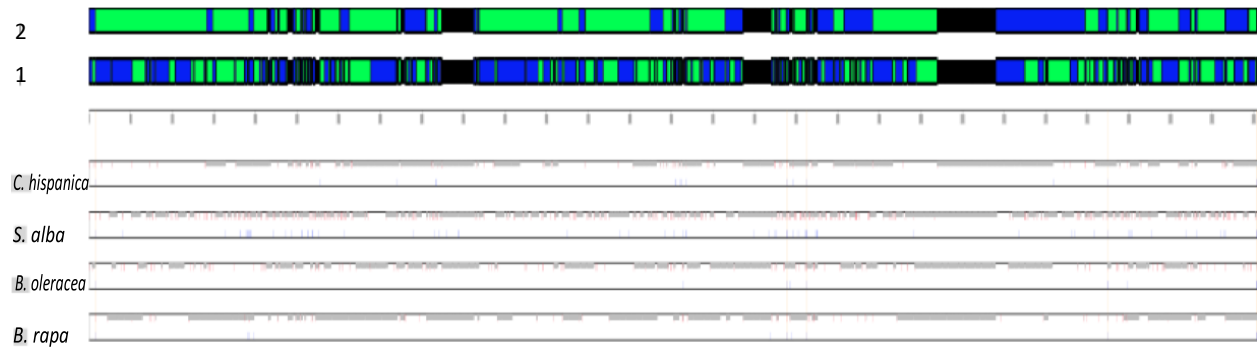

**Supplemental Fig S2.** Shared synteny blocks across four genomes. The green and blue blocks indicate shared parental subgenome assignment between at least three (lower blocks) or two (upper blocks) genomes with confidence  $> 0.85$ . Each change of color indicates a new block of genes with consistent assignments to the three subgenomes. Black areas indicate a lack of agreement in parental subgenome assignments. The four separate panels below show the POInT subgenome assignment in each species. Red ticks indicate switch in subgenome assignment, grey ticks indicate parental subgenome assignment confidence  $< 0.85$  and blue ticks indicate full synteny breaks in that genome relative to the inferred ancestral order.

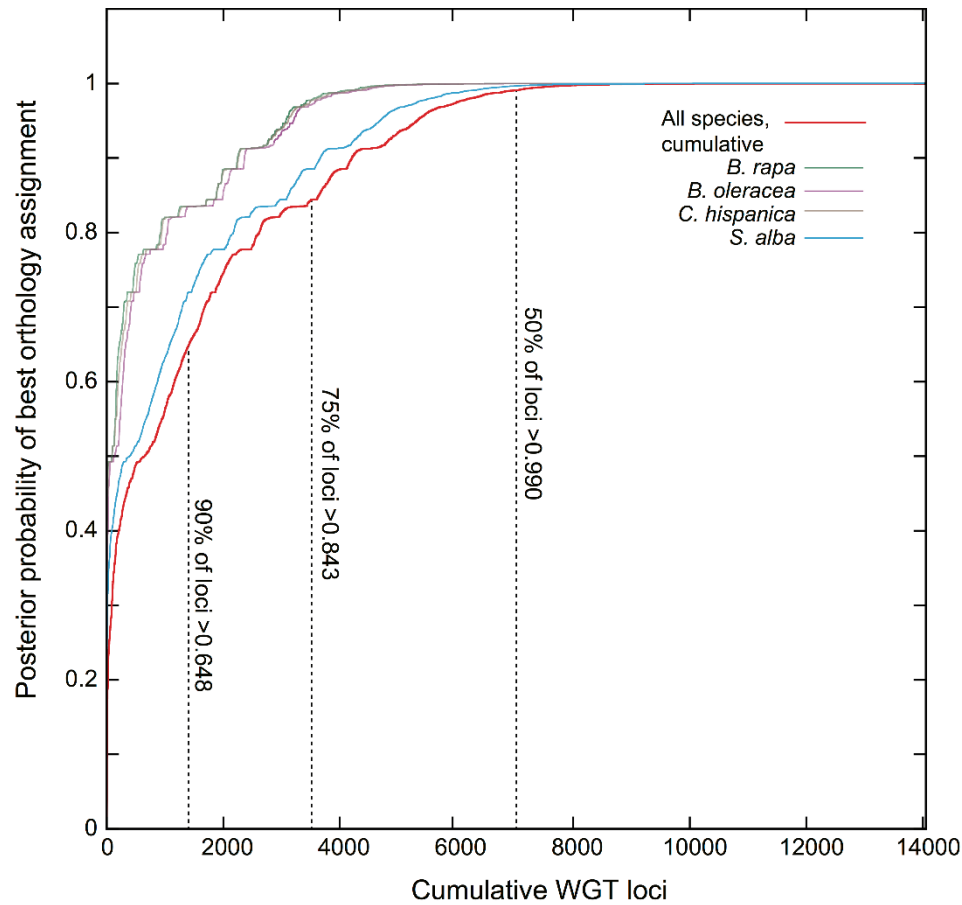

**Supplemental Fig S3.** Species-specific and shared posterior probabilities of all 14,050 loci. 50% of the loci have posterior probabilities larger than 0.99, 75% of the loci have posterior probabilities larger than 0.843, 90% of the loci have posterior probabilities larger than 0.648.



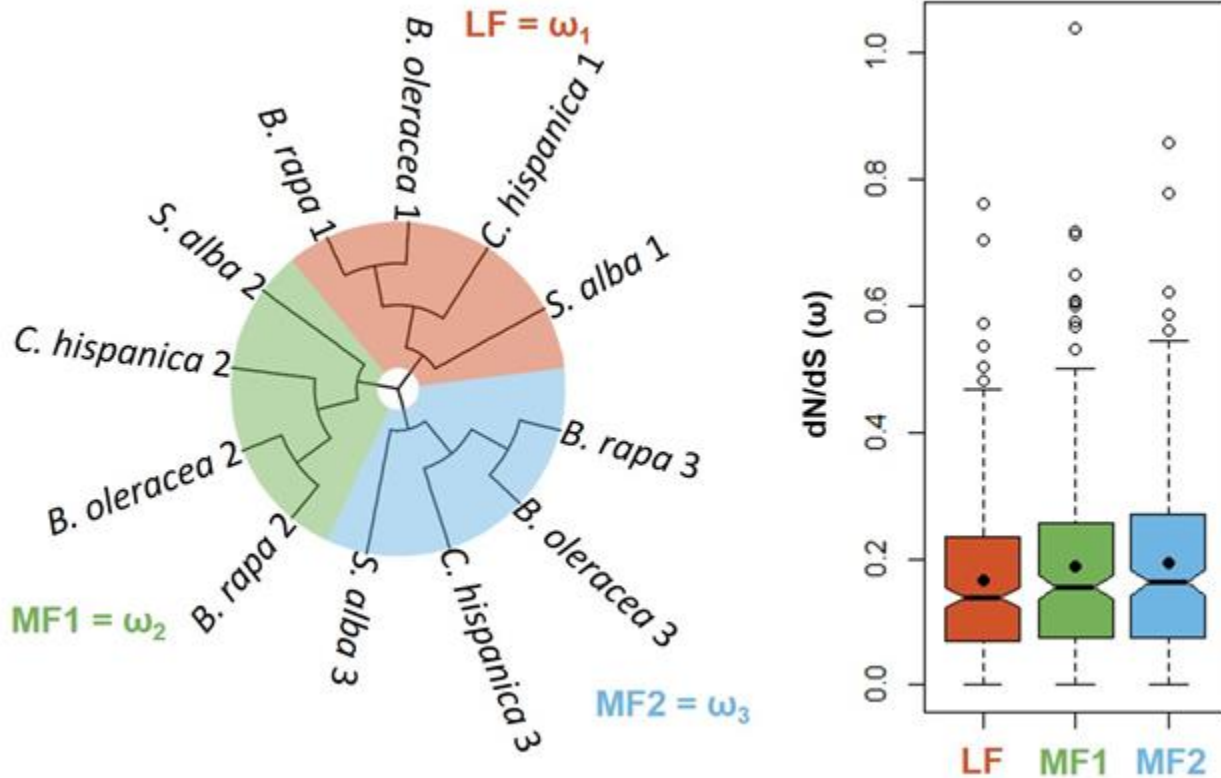

**Supplemental Fig S4.** Selective constraints of retained triplets partitioned into subgenomes. As shown in the schematic gene tree, three separate dN/dS values were estimated using codeml for each subtree containing four gene copies that were assigned to the same subgenome in four species. Notched box plots show the distributions of dN/dS for retained copies in each subgenome, LF, MF1 and MF2. The notches show the medians and the 95% confidence intervals. The black dots show the mean values. Pairwise Wilcoxon Rank Sum Tests (Mann and Whitney, 1947) were performed to compare the median selective constraints for retained triplets across subgenomes.

LF – MF1:  $P = 0.300$

LF – MF2:  $P = 0.079$

MF1 – MF2:  $P = 0.516$

a)

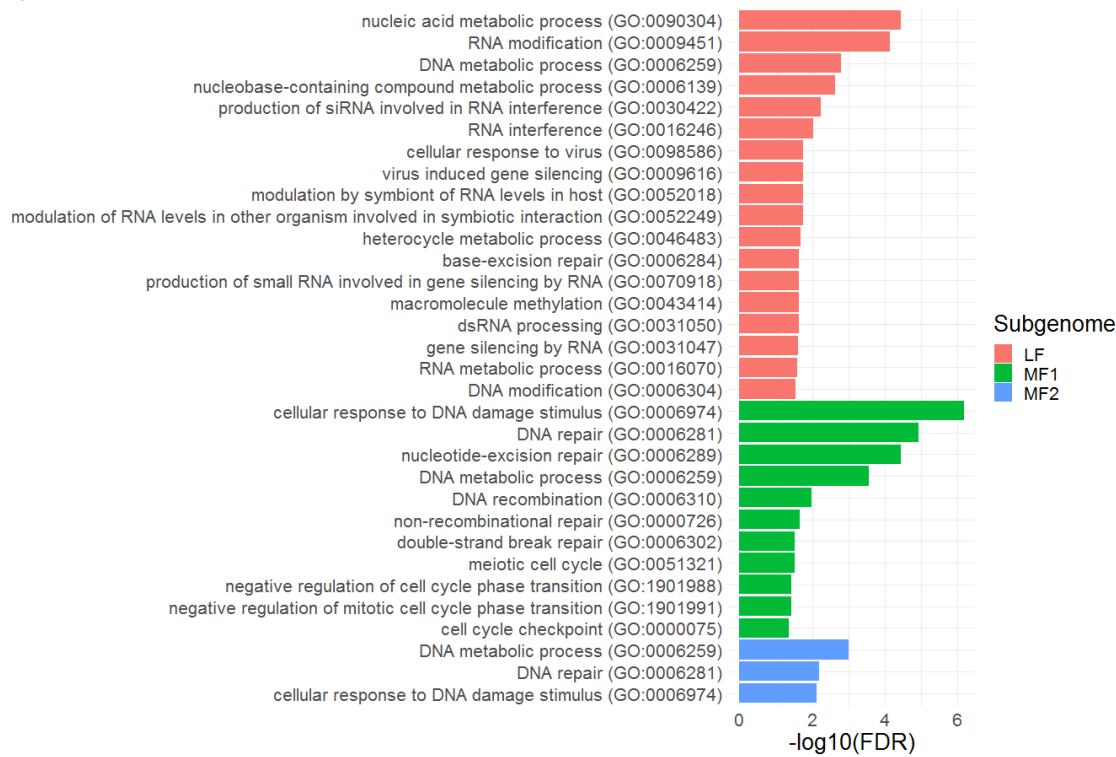

b)

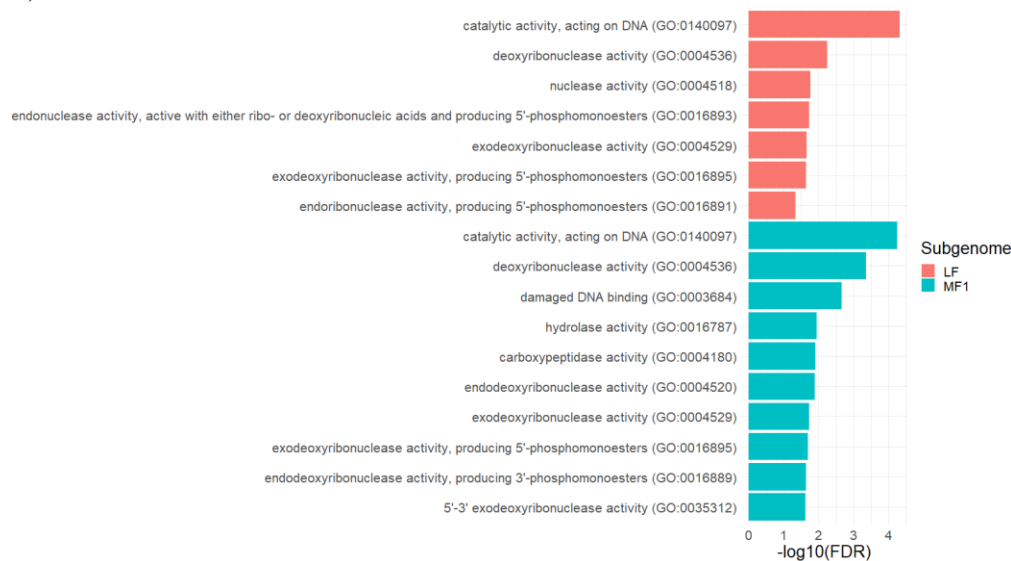

**Supplemental Fig S5.** PANTHER Biological Processes (a) and Molecular Functions (b) for the *Arabidopsis* orthologs of genes that returned to single copy at the root branch with  $\text{FDR} \geq 0.05$ . The target lists are single copy genes from three subgenomes LF, MF1 and MF2. The background list was set to be all the retained duplicates and triplets.

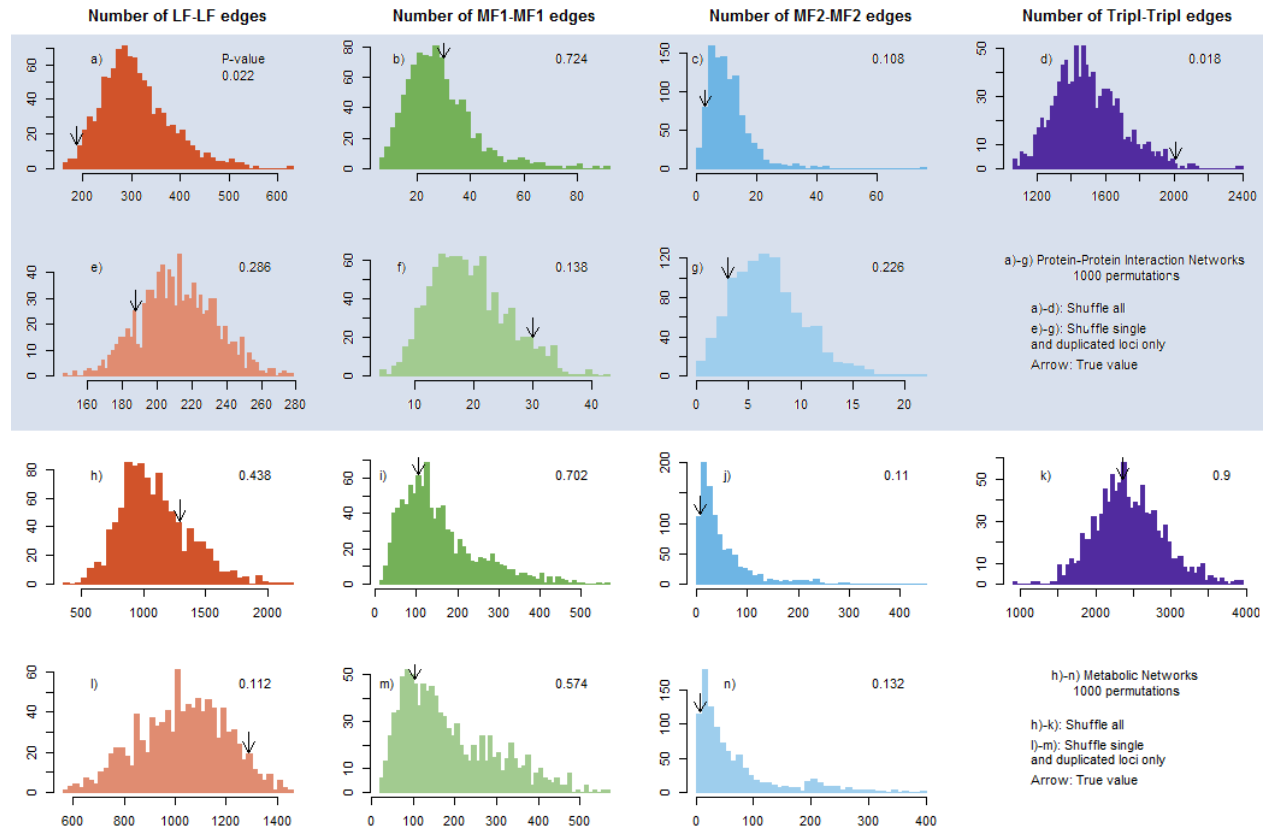

**Supplemental Fig S6.** Number of edges connecting nodes with single copy genes that are from the same subgenome in both protein-protein interaction network and metabolic network.

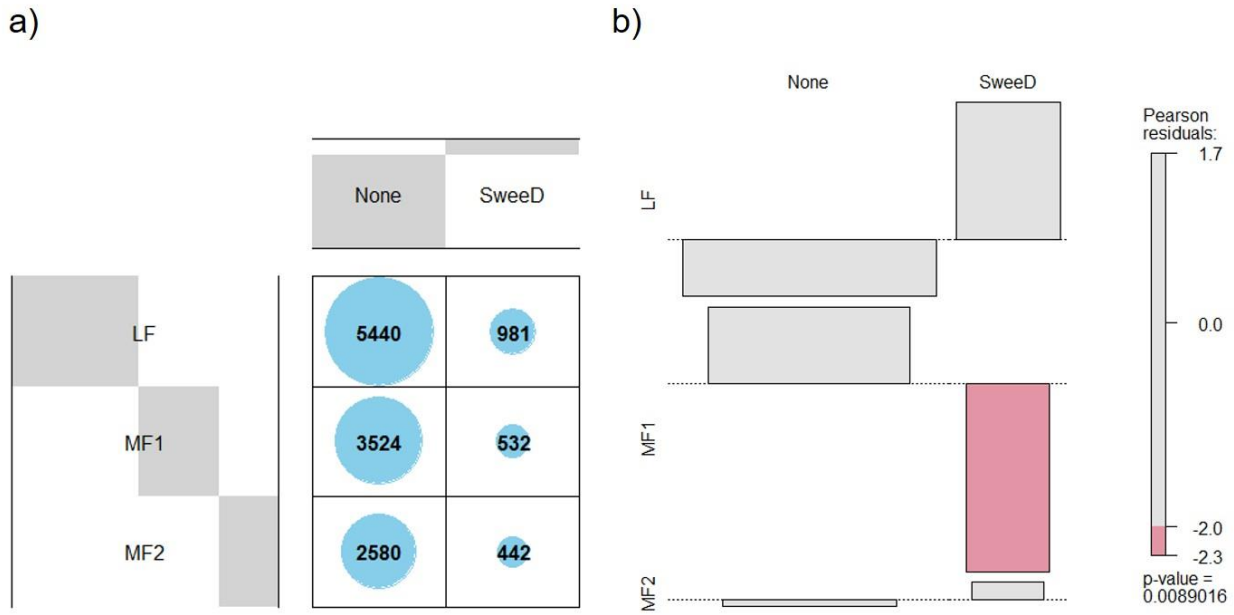

**Supplemental Fig S7.** *Brassica rapa* subgenome assignment and genes under selective sweep.

**a)** The number of genes from the three subgenomes (with 0.95 subgenome assignment confidence) versus selective sweeps. **b)** The association plot based on the contingency table in a). The red color in the association plot indicates that the observed value is lower than expected under the random assumption. P-value (0.0089) is from chi-squared test.
